# Supplementary material for: Systems pharmacology reveals the unique mechanism features of Shenzhu Capsule for treatment of ulcerative colitis in comparison with synthetic drugs
Source: PubMed Central journal article supplement (PMC6212405; doi:10.1038/s41598-018-34509-1), 2018-11-01
Supplement: 41598_2018_34509_MOESM1_ESM.pdf [file 41598_2018_34509_MOESM1_ESM.pdf]

**Systems pharmacology reveals the unique mechanism features of Shenzhu Capsule for treatment of ulcerative colitis in comparison with synthetic drugs**

**Wuwen Feng<sup>1,†</sup>, Hui Ao<sup>1,†</sup>, Shijun Yue<sup>2</sup>, Cheng Peng<sup>1,3</sup>**

<sup>1</sup>School of Pharmacy, Chengdu University of Traditional Chinese Medicine, Chengdu, China. <sup>2</sup>Key Laboratory of Marine Drugs (Ministry of Education of China), School of Medicine and Pharmacy, Ocean University of China, Qingdao, China. <sup>3</sup>State Key Laboratory Breeding Base of Systematic Research, Development and Utilization of Chinese Medicine Resources, Chengdu University of Traditional Chinese Medicine, Chengdu, China.

<sup>†</sup>These authors contributed equally to this work.

Correspondence should be addressed to C.P. (pengchengcxy@126.com)

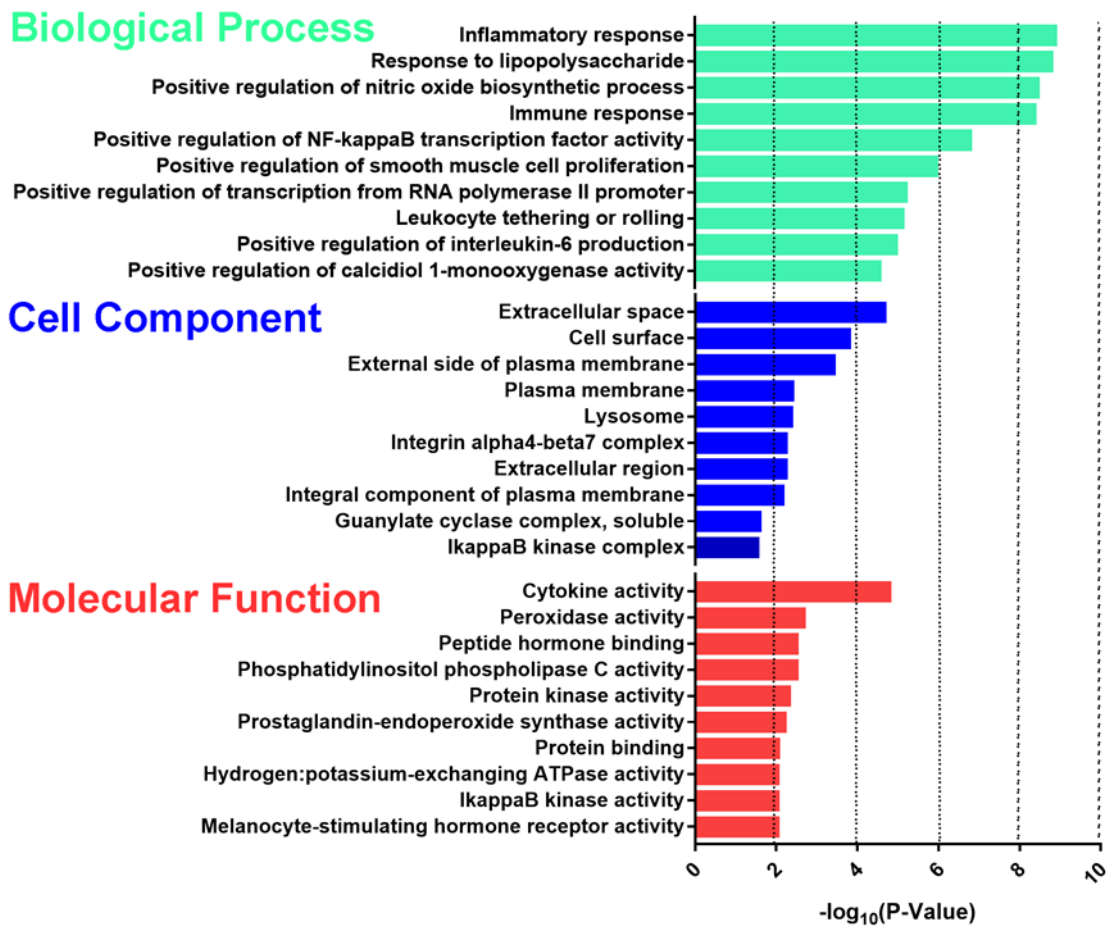

**Supplementary Figure S1 Gene ontology (GO) enrichment analysis of synthetic drugs used for treatment of ulcerative colitis.** The y-axis represents biological process (BP), cell component (CC) and molecular function (MF) terms of target genes, and the x-axis stands for  $-\log_{10}(P\text{-Value})$ .

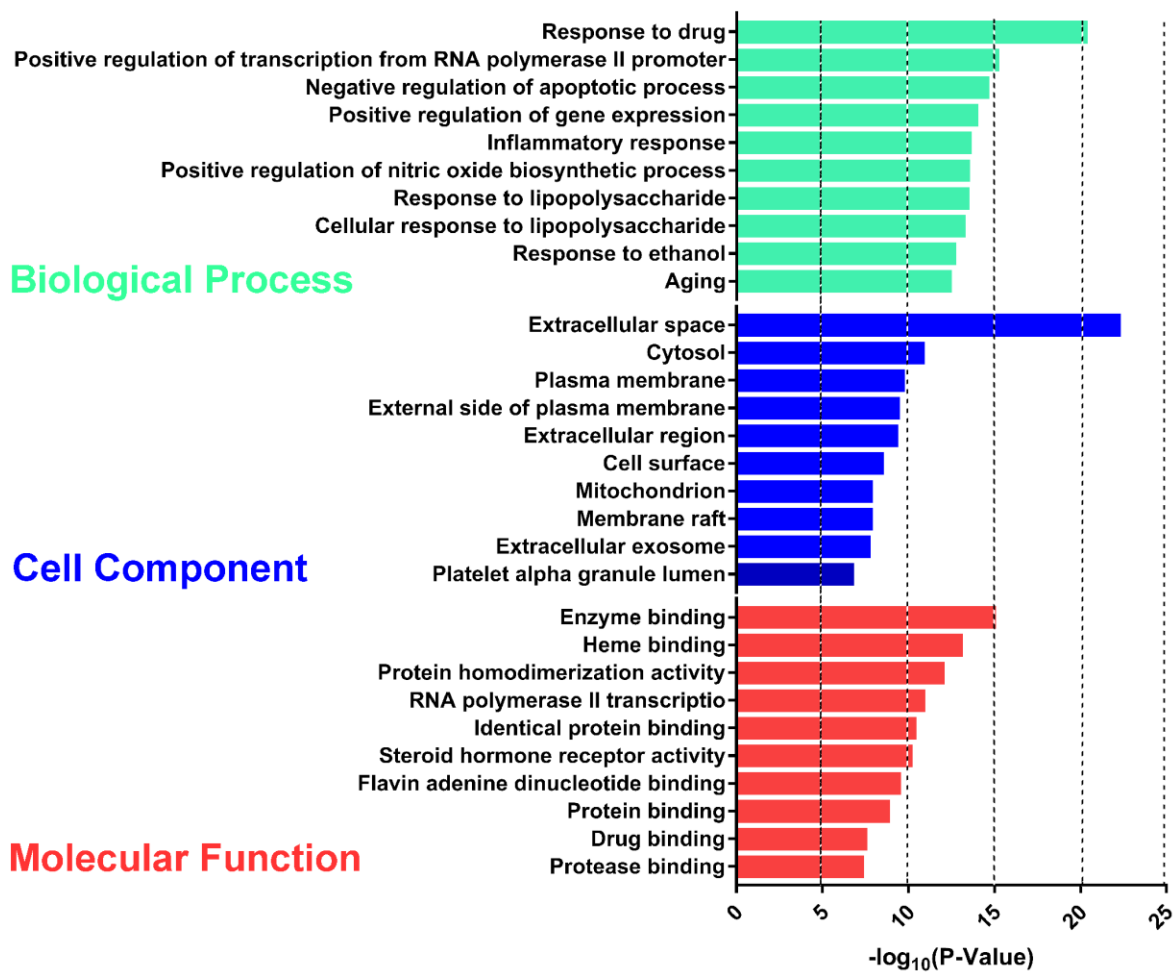

**Supplementary Figure 2 Gene ontology (GO) enrichment analysis of ShenZhu Capsule.** The y-axis represents biological process (BP), cell component (CC) and molecular function (MF) terms of target genes, and the x-axis stand for  $-\log_{10}(P\text{-Value})$ .

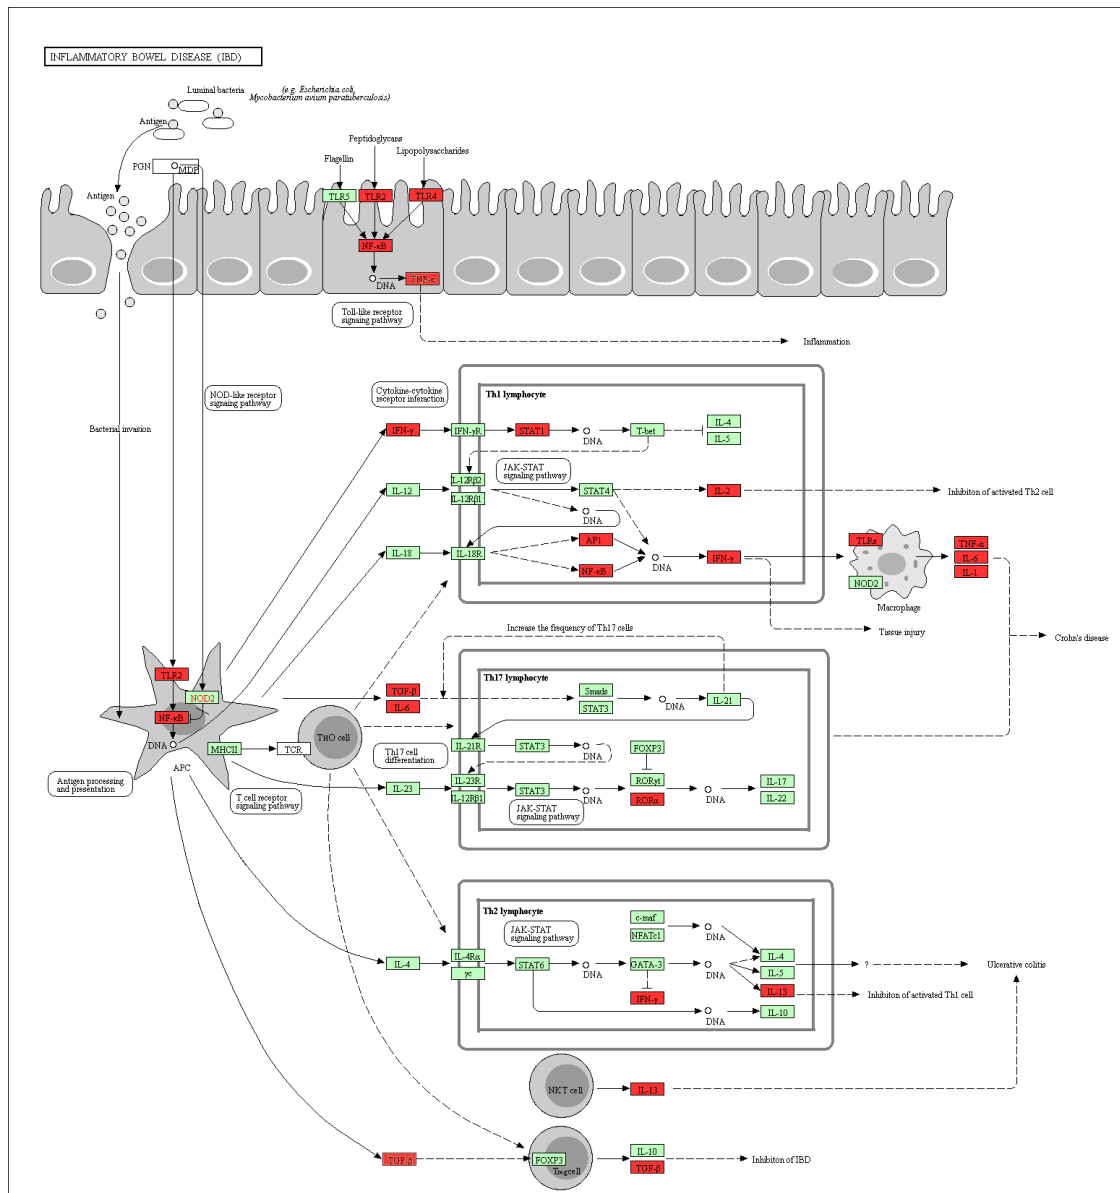

**Supplementary Figure S3 Distribution of targets of Shenzhu Capsule on the compressed inflammatory bowel disease (IBD) pathway.** The red nodes are potential targets of SZC, and the light blue nodes are relevant targets in the pathway. The compressed signaling pathway was obtained from KEGG<sup>1</sup>.

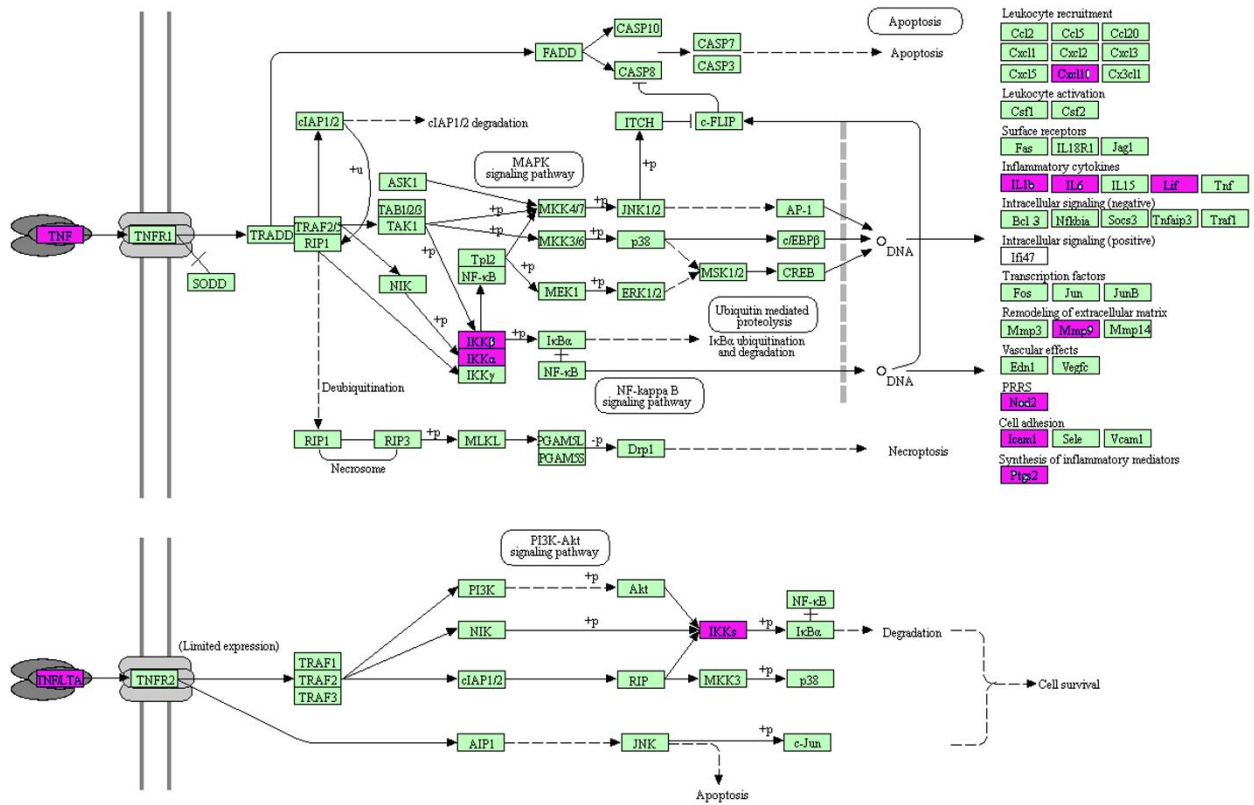

**Supplementary Figure S4 Distribution of the targets of synthetic drugs on the compressed TNF signaling pathway.** The red nodes are potential targets of synthetic drugs, and the light blue nodes are relevant targets in the pathway. The compressed signaling pathway was obtained from KEGG<sup>1</sup>.

Reference:

1 Kanehisa, M., Furumichi, M., Tanabe, M., Sato, Y., & Morishima, K. KEGG: new perspectives on genomes, pathways, diseases and drugs. *Nucleic Acids Res.* 45, D353-D361 (2017).

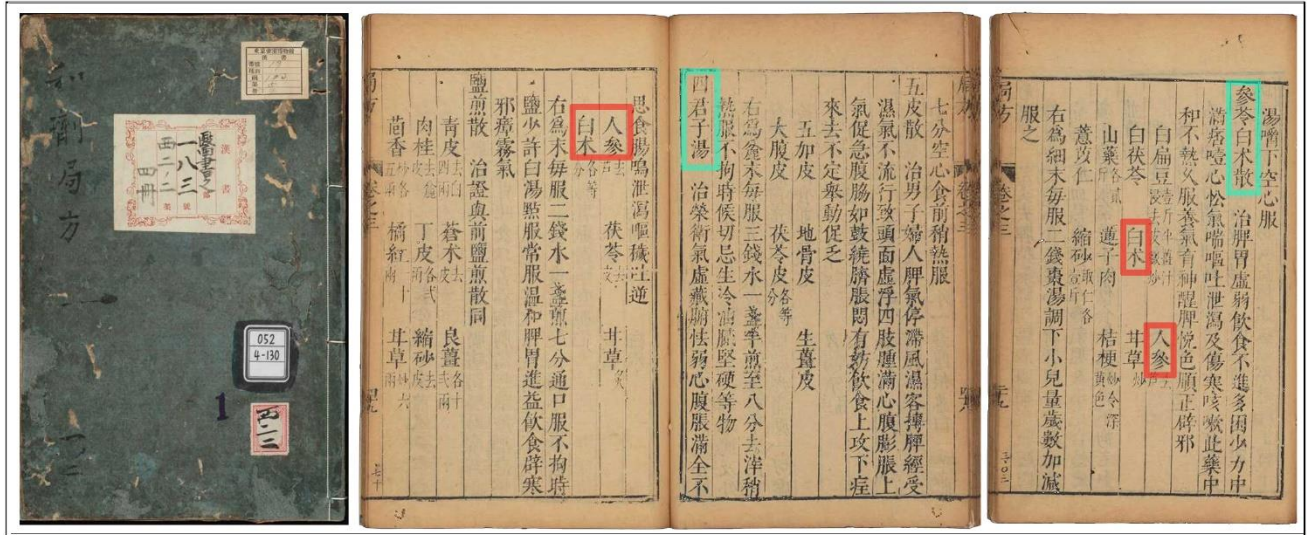

**Supplementary Figure S5 Renshen (人參) and Baizhu (白朮) recorded in ancient Chinese formulae.** (Pictures were downloaded from <http://zhongyibook.com/taipinghuiminhejijufang-scan/146.html>, and <http://zhongyibook.com/taipinghuiminhejijufang-scan/166.html>)

**Supplementary Table S1** The detailed information of all compounds in Renshen and Baizhu.

| <b>Compound No.</b> | <b>herb</b>            | <b>Compound</b>                                             | <b>CAS Number</b> | <b>MW</b> | <b>ClogP</b> | <b>Hdon</b> | <b>Hacc</b> | <b>OB</b> | <b>Caco-2</b> | <b>DL</b> |
|---------------------|------------------------|-------------------------------------------------------------|-------------------|-----------|--------------|-------------|-------------|-----------|---------------|-----------|
| C1                  | <i>A. macrocephala</i> | (2S)-2-azaniumyl-3-(4-hydroxyphenyl)propanoate              | 60-18-4           | 181.21    | 0.69         | 4           | 4           | 57.55     | -0.1          | 0.05      |
| C2                  | <i>A. macrocephala</i> | 3 $\beta$ -acetoxyatractylone                               | 61206-10-8        | 274.39    | 3.39         | 0           | 3           | 54.07     | 1.13          | 0.22      |
| C3                  | <i>A. macrocephala</i> | $\alpha$ -amyrin                                            | 638-95-9          | 426.8     | 7.35         | 1           | 1           | 39.51     | 1.42          | 0.76      |
| C4                  | <i>A. macrocephala</i> | atractylenolide I                                           | 73069-13-3        | 230.33    | 3.32         | 0           | 2           | 37.37     | 1.3           | 0.15      |
| C5                  | <i>A. macrocephala</i> | ethyl pivaloylacetate                                       | 17094-34-7        | 172.25    | 1.69         | 0           | 3           | 40.52     | 0.82          | 0.03      |
| C6                  | <i>A. macrocephala</i> | L-lysin                                                     | 56-87-1           | 146.22    | -0.68        | 5           | 4           | 29.33     | -0.66         | 0.02      |
| C7                  | <i>A. macrocephala</i> | (3S)-3-[(1R)-1,5-dimethylhex-4-enyl]-6-methylenecyclohexene | 20307-83-9        | 204.39    | 5.14         | 0           | 0           | 19.86     | 1.88          | 0.06      |
| C8                  | <i>A. macrocephala</i> | 8 $\beta$ -ethoxy atractylenolide III                       | N/A               | 276.41    | 3.68         | 0           | 3           | 35.95     | 1.08          | 0.21      |
| C9                  | <i>A. macrocephala</i> | uridine                                                     | 58-96-8           | 244.23    | -2.45        | 4           | 8           | 10.49     | -1.14         | 0.11      |
| C10                 | <i>A. macrocephala</i> | juniper camphor                                             | N/A               | 222.41    | 3.93         | 1           | 1           | 33.3      | 1.44          | 0.1       |
| C11                 | <i>A. macrocephala</i> | (3S)-3-azaniumyl-4-hydroxy-4-oxobutanoate                   | 56-84-8           | 133.12    | -1.25        | 4           | 5           | 79.74     | -1.02         | 0.02      |
| C12                 | <i>A. macrocephala</i> | selina-4(14),7(11)-dien-8-one                               | 54707-47-0        | 218.37    | 3.81         | 0           | 1           | 32.31     | 1.42          | 0.1       |
| C13                 | <i>A. macrocephala</i> | (1R)-2-methyl-1-phenylprop-2-en-1-ol                        | N/A               | 148.22    | 2.32         | 1           | 1           | 75.1      | 1.27          | 0.03      |
| C14                 | <i>A. macrocephala</i> | (24S)-24-propylcholesta-5-ene-3 $\beta$ -ol                 | 64997-52-0        | 428.82    | 8.54         | 1           | 1           | 36.23     | 1.45          | 0.78      |
| C15                 | <i>A. macrocephala</i> | (+/-)-isoborneol                                            | 124-76-5          | 154.28    | 1.98         | 1           | 1           | 86.98     | 1.27          | 0.05      |

|     |                        |                                                                  |             |        |       |   |   |       |       |      |
|-----|------------------------|------------------------------------------------------------------|-------------|--------|-------|---|---|-------|-------|------|
| C16 | <i>A. macrocephala</i> | $\alpha$ -longipinene                                            | 5989/8/2    | 204.39 | 4.12  | 0 | 0 | 53.26 | 1.83  | 0.12 |
| C17 | <i>A. macrocephala</i> | prolinum                                                         | 147-85-3    | 115.15 | -0.06 | 2 | 3 | 77.57 | 0.22  | 0.01 |
| C18 | <i>A. macrocephala</i> | scopoletol                                                       | 92-61-5     | 192.18 | 1.62  | 1 | 4 | 27.77 | 0.71  | 0.08 |
| C19 | <i>A. macrocephala</i> | biatractylolide                                                  | N/A         | 462.68 | 6.68  | 0 | 4 | 17.45 | 0.83  | 0.81 |
| C20 | <i>A. macrocephala</i> | stigmast-22E-en-3 $\beta$ -ol                                    | 481-18-5    | 414.79 | 7.89  | 1 | 1 | 10.39 | 1.43  | 0.75 |
| C21 | <i>A. macrocephala</i> | atractylone                                                      | 6989-21-5   | 216.35 | 4.11  | 0 | 1 | 41.1  | 1.76  | 0.13 |
| C22 | <i>A. macrocephala</i> | akridin                                                          | 260-94-6    | 179.23 | 3.35  | 0 | 1 | 33.71 | 1.63  | 0.1  |
| C23 | <i>A. macrocephala</i> | 2-[(2R,5S,6S)-6,10-dimethylspiro-[4.5]dec-9-en-2-yl]-propan-2-ol | 23811-08-7  | 222.41 | 3.67  | 1 | 1 | 38.59 | 1.34  | 0.09 |
| C24 | <i>A. macrocephala</i> | istidina                                                         | 71-00-1     | 155.18 | -1.01 | 4 | 4 | 53.18 | -0.25 | 0.03 |
| C25 | <i>A. macrocephala</i> | $\alpha$ -humulene                                               | 6753-98-6   | 204.39 | 5.04  | 0 | 0 | 22.98 | 1.88  | 0.06 |
| C26 | <i>A. macrocephala</i> | L-valin                                                          | 72-18-4     | 117.17 | 0.24  | 3 | 3 | 53.33 | 0.04  | 0.01 |
| C27 | <i>A. macrocephala</i> | $\alpha$ -curcumene                                              | 4176-17-4   | 202.37 | 5.34  | 0 | 0 | 4.68  | 1.93  | 0.06 |
| C28 | <i>A. macrocephala</i> | (1S,2R,4R)-neoiso-dihydrocarveol                                 | 51773-45-6  | 154.28 | 2.58  | 1 | 1 | 52.4  | 1.38  | 0.03 |
| C29 | <i>A. macrocephala</i> | bis(2-methylpropyl) benzene-1,2-dicarboxylate                    | 84-69-5     | 278.38 | 3.92  | 0 | 4 | 49.63 | 0.85  | 0.13 |
| C30 | <i>A. macrocephala</i> | 14-acetyl-12-senecioyl-2E,8E,10E-atractylentriol                 | 113269-37-7 | 355.44 | 3.21  | 0 | 5 | 60.31 | 0.33  | 0.31 |
| C31 | <i>A. macrocephala</i> | gulutamine                                                       | 56-86-0     | 147.15 | -0.92 | 4 | 5 | 6.66  | -1.05 | 0.02 |
| C32 | <i>A. macrocephala</i> | phenylalanine                                                    | 63-91-2     | 165.21 | 0.96  | 3 | 3 | 41.62 | 0.36  | 0.04 |
| C33 | <i>A. macrocephala</i> | D-serin                                                          | 56-45-1     | 105.11 | -1.49 | 4 | 4 | 83.59 | -0.94 | 0.01 |
| C34 | <i>A. macrocephala</i> | (5E,9Z)-3,6,10-trimethyl-4,7,8,11-                               | 19912-61-9  | 216.35 | 4.63  | 0 | 1 | 43.17 | 1.77  | 0.1  |



| tetrahydrocyclodeca-[b]-furan |                                               |                                                                     |             |        |       |   |   |       |       |      |
|-------------------------------|-----------------------------------------------|---------------------------------------------------------------------|-------------|--------|-------|---|---|-------|-------|------|
| C35                           | <i>A. macrocephala</i>                        | $\beta$ -eudesmol                                                   | 473-15-4    | 222.41 | 3.72  | 1 | 1 | 26.09 | 1.32  | 0.1  |
| C36                           | <i>A. macrocephala</i>                        | (2S)-2-amino-5-(diaminomethylideneazaniumyl)pentanoate              | 74-79-3     | 174.24 | -1.11 | 7 | 6 | 47.64 | -0.49 | 0.03 |
| C37                           | <i>A. macrocephala</i>                        | hemo-sol                                                            | 5989-27-5   | 136.26 | 3.5   | 0 | 0 | 39.84 | 1.83  | 0.02 |
| C38                           | <i>A. macrocephala</i>                        | 12-senecioid-2E,8E,10E-atractylentriol                              | 113269-39-9 | 312.39 | 2.5   | 0 | 4 | 62.4  | 0.01  | 0.22 |
| C39                           | <i>A. macrocephala</i>                        | methose                                                             | 57-48-7     | 180.18 | -2.69 | 5 | 6 | 1.68  | -1.8  | 0.03 |
| C40                           | <i>A. macrocephala</i>                        | polymannose                                                         | 30142-85-9  | 180.18 | -2.68 | 5 | 6 | 1.76  | -1.94 | 0.03 |
| C41                           | <i>A. macrocephala</i>                        | atractylenolide II                                                  | 73069-14-4  | 232.35 | 3.57  | 0 | 2 | 47.5  | 1.3   | 0.15 |
| C42                           | <i>A. macrocephala</i>                        | 2-[(1R,3S,4S)-3-isopropenyl-4-methyl-4-vinylcyclohexyl]-propan-2-ol | 639-99-6    | 222.41 | 3.7   | 1 | 1 | 19.03 | 1.37  | 0.07 |
| C43                           | <i>A. macrocephala</i>                        | atractylenolide III                                                 | 73030-71-4  | 248.35 | 2.93  | 1 | 3 | 68.11 | 0.75  | 0.17 |
| C44                           | <i>A. macrocephala</i>                        | D-camphene                                                          | 5794/3/6    | 136.26 | 2.93  | 0 | 0 | 34.98 | 1.81  | 0.04 |
| C45                           | <i>A. macrocephala</i>                        | L-Ile                                                               | 73-32-5     | 131.2  | 0.7   | 3 | 3 | 59.05 | 0.06  | 0.02 |
| C46                           | <i>A. macrocephala</i>                        | $\gamma$ -elemene                                                   | 29873-99-2  | 204.39 | 4.93  | 0 | 0 | 23.79 | 1.87  | 0.06 |
| C47                           | <i>A. macrocephala</i><br>& <i>P. ginseng</i> | $\beta$ -humulene                                                   | 116-04-1    | 204.39 | 5.09  | 0 | 0 | 26.87 | 1.82  | 0.06 |
| C48                           | <i>A. macrocephala</i><br>& <i>P. ginseng</i> | alloaromadrene                                                      | 25246-27-9  | 204.39 | 4.22  | 0 | 0 | 53.46 | 1.83  | 0.1  |

|     |                                               |                                           |             |          |       |    |    |       |       |      |
|-----|-----------------------------------------------|-------------------------------------------|-------------|----------|-------|----|----|-------|-------|------|
| C49 | <i>A. macrocephala</i><br>& <i>P. ginseng</i> | palmitic acid                             | 67701-02-4  | 256.48   | 6.37  | 1  | 2  | 19.3  | 1.09  | 0.1  |
| C50 | <i>A. macrocephala</i><br>& <i>P. ginseng</i> | $\beta$ -caryophyllene                    | 87-44-5     | 204.39   | 4.75  | 0  | 0  | 29.7  | 1.83  | 0.09 |
| C51 | <i>A. macrocephala</i><br>& <i>P. ginseng</i> | $\beta$ -selinene                         | 17066-67-0  | 204.39   | 4.81  | 0  | 0  | 24.39 | 1.83  | 0.08 |
| C52 | <i>P. ginseng</i>                             | <i>n</i> -heptadecanol                    | 52783-44-5  | 256.53   | 6.9   | 1  | 1  | 12.97 | 1.31  | 0.09 |
| C53 | <i>P. ginseng</i>                             | ginsenoside Rh5                           | N/A         | 636.96   | 2.79  | 7  | 9  | 3.23  | -1.36 | 0.57 |
| C54 | <i>P. ginseng</i>                             | ginsenoside Re                            | 51542-56-4  | 947.3    | 0.27  | 12 | 18 | 4.27  | -3.2  | 0.12 |
| C55 | <i>P. ginseng</i>                             | 2,3,8-trimethyldecane                     | 62238-14-6  | 184.41   | 5.69  | 0  | 0  | 5.51  | 1.79  | 0.03 |
| C56 | <i>P. ginseng</i>                             | <i>p</i> -glucosyloxymandelonitrile       | N/A         | 298.37   | -0.47 | 5  | 6  | 12.12 | -0.92 | 0.18 |
| C57 | <i>P. ginseng</i>                             | methyl pentadecanoate                     | 7132-64-1   | 256.48   | 6.16  | 0  | 2  | 18.82 | 1.37  | 0.1  |
| C58 | <i>P. ginseng</i>                             | <i>D</i> -erythro-isocitric acid          | 30810-51-6  | 192.14   | -1.34 | 4  | 7  | 65.43 | -1.67 | 0.04 |
| C59 | <i>P. ginseng</i>                             | ginsenoside Rg1                           | 22427-39-0  | 801.14   | 1.13  | 10 | 14 | 10.04 | -2.27 | 0.28 |
| C60 | <i>P. ginseng</i>                             | ginsenoside Rh8                           | N/A         | 622.93   | 2.62  | 7  | 9  | 4.39  | -1.24 | 0.63 |
| C61 | <i>P. ginseng</i>                             | ginsenoynes D                             | 139163-36-3 | 262.43   | 4.94  | 1  | 2  | 19.32 | 1.07  | 0.13 |
| C62 | <i>P. ginseng</i>                             | elemicin                                  | 487-11-6    | 208.28   | 2.79  | 0  | 3  | 21.94 | 1.41  | 0.06 |
| C63 | <i>P. ginseng</i>                             | ginsenoside Rh9 <sub>qt</sub>             | N/A         | 474.8    | 4.16  | 3  | 4  | 9.61  | 0.29  | 0.77 |
| C64 | <i>P. ginseng</i>                             | argininyl-fructosyl-glucose <sub>qt</sub> | N/A         | 336.4    | -2.88 | 10 | 11 | 11.25 | -1.74 | 0.22 |
| C65 | <i>P. ginseng</i>                             | ginsenoside Ra3                           | 90985-77-6  | 1,241.59 | -2.43 | 17 | 27 | 7.19  | -4.67 | 0.02 |
| C66 | <i>P. ginseng</i>                             | panaxatriol                               | 32791-84-7  | 476.82   | 4.29  | 3  | 4  | 15.42 | 0.52  | 0.79 |
| C67 | <i>P. ginseng</i>                             | <i>N</i> -salicylidene-salicylamine       | N/A         | 227.28   | 2.9   | 2  | 3  | 95.46 | 1.12  | 0.11 |

|     |                   |                                                                                                                                                                                 |             |        |       |    |    |       |       |      |
|-----|-------------------|---------------------------------------------------------------------------------------------------------------------------------------------------------------------------------|-------------|--------|-------|----|----|-------|-------|------|
| C68 | <i>P. ginseng</i> | stearyl acetate                                                                                                                                                                 | 822-23-1    | 312.6  | 7.74  | 0  | 2  | 16.27 | 1.39  | 0.19 |
| C69 | <i>P. ginseng</i> | ginsenoside Rg1_qt                                                                                                                                                              | N/A         | 476.82 | 4.62  | 4  | 4  | 10.2  | 0.12  | 0.78 |
| C70 | <i>P. ginseng</i> | ginsenoside Rf                                                                                                                                                                  | 52286-58-5  | 801.14 | 1.13  | 10 | 14 | 17.74 | -2.23 | 0.24 |
| C71 | <i>P. ginseng</i> | ginsenoside-Rg4_qt                                                                                                                                                              | 126223-28-7 | 458.8  | 5.84  | 3  | 3  | 10.74 | 0.25  | 0.81 |
| C72 | <i>P. ginseng</i> | ginsenoside Rh4                                                                                                                                                                 | 174721-08-5 | 620.96 | 3.84  | 6  | 8  | 3.25  | -0.8  | 0.6  |
| C73 | <i>P. ginseng</i> | ginsenoside-Rg2                                                                                                                                                                 | 52286-74-5  | 785.14 | 2.02  | 9  | 13 | 10.09 | -1.94 | 0.26 |
| C74 | <i>P. ginseng</i> | folinic acid                                                                                                                                                                    | N/A         | 473.5  | -0.04 | 8  | 14 | 23.6  | -1.7  | 0.74 |
| C75 | <i>P. ginseng</i> | 1-dodecanol                                                                                                                                                                     | 112-53-8    | 186.38 | 4.62  | 1  | 1  | 18.5  | 1.23  | 0.03 |
| C76 | <i>P. ginseng</i> | 3-O- $\beta$ -D-glucuronopyranosyl<br>gypsogenin_qt                                                                                                                             | N/A         | 470.76 | 5.59  | 2  | 4  | 23.72 | 0.22  | 0.75 |
| C77 | <i>P. ginseng</i> | L-adenosine                                                                                                                                                                     | 58-61-7     | 267.28 | -2.02 | 5  | 8  | 18.06 | -1.42 | 0.18 |
| C78 | <i>P. ginseng</i> | psuedohypericin                                                                                                                                                                 | 55954-61-5  | 520.46 | 3.8   | 7  | 9  | 16.94 | -0.2  | 0.07 |
| C79 | <i>P. ginseng</i> | [(3S,4R,5R)-5-[[[(2R,3S,4S,5R,6S)-<br>6-(2-acetyl-5-methoxyphenoxy)-<br>3,4,5-trihydroxyoxan-2-<br>yl]methoxy]-3,4-dihydroxyoxolan-<br>3-yl]methyl 3,4,5-<br>trihydroxybenzoate | 145898-94-8 | 612.59 | -0.79 | 8  | 16 | 5.61  | -2.17 | 0.63 |
| C80 | <i>P. ginseng</i> | $\beta$ -bisabolene                                                                                                                                                             | 495-61-4    | 204.39 | 5.33  | 0  | 0  | 29.59 | 1.88  | 0.06 |
| C81 | <i>P. ginseng</i> | kaempferol-3-arabofuranoside                                                                                                                                                    | 5041-67-8   | 418.38 | 0.19  | 6  | 10 | 2.73  | -1.08 | 0.65 |
| C82 | <i>P. ginseng</i> | ginsenoside Rh3                                                                                                                                                                 | 105558-26-7 | 618.99 | 5.47  | 5  | 7  | 12.18 | -0.22 | 0.53 |
| C83 | <i>P. ginseng</i> | hepanal                                                                                                                                                                         | 111-71-7    | 204.39 | 4.36  | 0  | 0  | 53.83 | 1.86  | 0.1  |

|     |                   |                                                                                                                                                                                             |            |          |       |    |    |       |       |      |
|-----|-------------------|---------------------------------------------------------------------------------------------------------------------------------------------------------------------------------------------|------------|----------|-------|----|----|-------|-------|------|
| C84 | <i>P. ginseng</i> | ginsenoside RS9                                                                                                                                                                             | N/A        | 663.05   | 4.63  | 5  | 8  | 11.27 | -0.76 | 0.46 |
| C85 | <i>P. ginseng</i> | tetradecane                                                                                                                                                                                 | 629-59-4   | 198.44   | 6.76  | 0  | 0  | 15.94 | 1.79  | 0.04 |
| C86 | <i>P. ginseng</i> | ginsenoside Rg2_qt                                                                                                                                                                          | 80952-72-3 | 476.82   | 4.62  | 4  | 4  | 20.13 | 0.17  | 0.78 |
| C87 | <i>P. ginseng</i> | pandamine                                                                                                                                                                                   | 10233-81-5 | 552.79   | 3.87  | 4  | 9  | 16.15 | 0.11  | 0.79 |
| C88 | <i>P. ginseng</i> | ginsenoside Rs2                                                                                                                                                                             | 87733-66-2 | 1,121.47 | -0.31 | 13 | 23 | 8.14  | -4.03 | 0.04 |
| C89 | <i>P. ginseng</i> | (2R,3S,4S,5S,6R)-6-(hydroxymethyl)oxane-2,3,4,5-tetrol                                                                                                                                      | 7322-31-8  | 180.18   | -2.51 | 5  | 6  | 43.04 | -1.82 | 0.04 |
| C90 | <i>P. ginseng</i> | methyl linoleate                                                                                                                                                                            | 112-63-0   | 294.53   | 6.64  | 0  | 2  | 41.93 | 1.44  | 0.17 |
| C91 | <i>P. ginseng</i> | 6'-malonylginsenoside Rd1                                                                                                                                                                   | N/A        | 1,195.51 | -1.03 | 15 | 26 | 6.7   | -4.21 | 0.03 |
| C92 | <i>P. ginseng</i> | araloside A                                                                                                                                                                                 | 7518-22-1  | 927.21   | 1.74  | 10 | 18 | 16.96 | -3.32 | 0.06 |
| C93 | <i>P. ginseng</i> | 3-methylheptane                                                                                                                                                                             | 589-81-1   | 114.26   | 3.82  | 0  | 0  | 37.1  | 1.8   | 0.01 |
| C94 | <i>P. ginseng</i> | ginsenoside F2_qt                                                                                                                                                                           | 11021-13-9 | 460.82   | 5.79  | 3  | 3  | 29.69 | 0.5   | 0.77 |
| C95 | <i>P. ginseng</i> | (3S,5R,6S,8R,9R,10R,12R,13R,14R,17S)-17-[(2R)-2-hydroxy-6-methylhept-5-en-2-yl]-4,4,8,10,14-pentamethyl-2,3,5,6,7,9,11,12,13,15,16,17-dodecahydro-1H-cyclopenta[a]phenanthrene-3,6,12-triol | 1453-93-6  | 476.82   | 4.62  | 4  | 4  | 20.13 | 0.21  | 0.78 |
| C96 | <i>P. ginseng</i> | girinimbin                                                                                                                                                                                  | 23095-44-5 | 263.36   | 4.6   | 1  | 1  | 61.22 | 1.72  | 0.31 |
| C97 | <i>P. ginseng</i> | ditertbutyl phthalate                                                                                                                                                                       | 30448-43-2 | 278.38   | 3.4   | 0  | 4  | 43.67 | 1.13  | 0.13 |

|      |                   |                        |             |          |       |    |    |       |       |      |
|------|-------------------|------------------------|-------------|----------|-------|----|----|-------|-------|------|
| C98  | <i>P. ginseng</i> | ginsenoside Rb1        | 41753-43-9  | 1,109.46 | -1.2  | 15 | 23 | 6.24  | -3.99 | 0.04 |
| C99  | <i>P. ginseng</i> | 5-isobutylnonane       | 62185-53-9  | 184.41   | 5.89  | 0  | 0  | 6.08  | 1.82  | 0.03 |
| C100 | <i>P. ginseng</i> | panaxynol              | 21852-80-2  | 244.41   | 5.68  | 1  | 1  | 42.44 | 1.52  | 0.1  |
| C101 | <i>P. ginseng</i> | ginsenoside Rg4        | 126223-28-7 | 767.12   | 3.23  | 8  | 12 | 10.9  | -1.77 | 0.27 |
| C102 | <i>P. ginseng</i> | methyl margarate       | 1731-92-6   | 284.54   | 7.08  | 0  | 2  | 17.41 | 1.37  | 0.14 |
| C103 | <i>P. ginseng</i> | methyl palmitate       | 112-39-0    | 270.51   | 6.62  | 0  | 2  | 18.09 | 1.37  | 0.12 |
| C104 | <i>P. ginseng</i> | malonic acid           | 141-82-2    | 104.07   | -0.44 | 2  | 4  | 21.69 | -0.23 | 0.01 |
| C105 | <i>P. ginseng</i> | neohexane              | 75-83-2     | 86.2     | 2.65  | 0  | 0  | 37.81 | 1.77  | 0.01 |
| C106 | <i>P. ginseng</i> | alexandrin             | 474-58-8    | 576.95   | 6.34  | 4  | 6  | 20.63 | -0.1  | 0.63 |
| C107 | <i>P. ginseng</i> | adenosine triphosphate | N/A         | 491.22   | -4.3  | 8  | 16 | 8.23  | -3.1  | 0.58 |
| C108 | <i>P. ginseng</i> | ginsenoside Rh8_qt     | N/A         | 460.77   | 4.37  | 4  | 4  | 14.72 | -0.04 | 0.8  |
| C109 | <i>P. ginseng</i> | 2,3,4-trimethyldecane  | 62238-15-7  | 184.41   | 5.69  | 0  | 0  | 16.15 | 1.82  | 0.03 |
| C110 | <i>P. ginseng</i> | 1-hexadecyne           | 629-74-3    | 222.46   | 7.86  | 0  | 0  | 3.94  | 1.89  | 0.06 |
| C111 | <i>P. ginseng</i> | ginsenoside Rh1_qt     | 63223-86-9  | 476.82   | 4.62  | 4  | 4  | 8.91  | 0.12  | 0.78 |
| C112 | <i>P. ginseng</i> | nepetin                | 520-11-6    | 316.28   | 2.05  | 4  | 7  | 26.75 | 0.37  | 0.31 |
| C113 | <i>P. ginseng</i> | ginsenoside Re         | 52286-59-6  | 933.27   | 0.06  | 12 | 18 | 5.42  | -2.88 | 0.13 |
| C114 | <i>P. ginseng</i> | tridecanoic acid       | 638-53-9    | 214.39   | 5     | 1  | 2  | 22.32 | 1.04  | 0.05 |
| C115 | <i>P. ginseng</i> | ginsenoside La_qt      | N/A         | 458.8    | 5.33  | 2  | 3  | 15.7  | 0.65  | 0.78 |
| C116 | <i>P. ginseng</i> | campesteryl ferulate   | 20972-07-0  | 576.94   | 9.86  | 1  | 4  | 22.1  | 1.1   | 0.59 |
| C117 | <i>P. ginseng</i> | 9-hexadecenoic acid    | 10030-73-6  | 254.46   | 5.92  | 1  | 2  | 35.78 | 1.1   | 0.1  |
| C118 | <i>P. ginseng</i> | ginsenoside Rg3        | 14197-60-5  | 785.14   | 2.3   | 9  | 13 | 13.69 | -1.65 | 0.22 |
| C119 | <i>P. ginseng</i> | malvic acid            | 503-05-9    | 280.5    | 6.44  | 1  | 2  | 30.99 | 1.22  | 0.15 |

|      |                   |                                                                                                       |             |          |       |    |    |       |       |      |
|------|-------------------|-------------------------------------------------------------------------------------------------------|-------------|----------|-------|----|----|-------|-------|------|
| C120 | <i>P. ginseng</i> | ginsenoside Rg3                                                                                       | 14197-60-5  | 785.14   | 2.3   | 9  | 13 | 12.43 | -1.75 | 0.22 |
| C121 | <i>P. ginseng</i> | 3,4-dimethylheptane                                                                                   | 922-28-1    | 128.29   | 4.07  | 0  | 0  | 46.67 | 1.78  | 0.01 |
| C122 | <i>P. ginseng</i> | ginsenoside Ra1                                                                                       | 83459-41-0  | 1,211.56 | -1.92 | 16 | 26 | 7.09  | -4.51 | 0.02 |
| C123 | <i>P. ginseng</i> | malonylginsenoside Rd_qt                                                                              | N/A         | 460.82   | 5.79  | 3  | 3  | 29.69 | 0.47  | 0.77 |
| C124 | <i>P. ginseng</i> | dibutyl benzene-1,2-dicarboxylate                                                                     | 84-74-2     | 278.38   | 4.2   | 0  | 4  | 64.54 | 0.8   | 0.13 |
| C125 | <i>P. ginseng</i> | ginsenoside Ra1_qt                                                                                    | 68406-26-8  | 460.82   | 5.79  | 3  | 3  | 29.69 | 0.3   | 0.77 |
| C126 | <i>P. ginseng</i> | paeonol                                                                                               | 552-41-0    | 166.19   | 1.29  | 1  | 3  | 28.79 | 0.93  | 0.04 |
| C127 | <i>P. ginseng</i> | methyl (Z)-icos-11-enoate                                                                             | 2390-09-2   | 324.61   | 8     | 0  | 2  | 29.49 | 1.41  | 0.23 |
| C128 | <i>P. ginseng</i> | pamalic acid                                                                                          | 500-37-8    | 346.36   | 3.77  | 3  | 7  | 6     | 0.35  | 0.3  |
| C129 | <i>P. ginseng</i> | $\alpha$ -D-mannopyranuronic acid                                                                     | N/A         | 194.16   | -2.31 | 5  | 7  | 56.17 | -2.14 | 0.06 |
| C130 | <i>P. ginseng</i> | ginsenoside Rb2                                                                                       | 11021-13-9  | 1,079.43 | -0.69 | 14 | 22 | 5.98  | -4.07 | 0.04 |
| C131 | <i>P. ginseng</i> | $\alpha$ -guttiferin                                                                                  | N/A         | 452.59   | 6.41  | 3  | 6  | 4.43  | 0.59  | 0.65 |
| C132 | <i>P. ginseng</i> | ginsenoside F3                                                                                        | 62025-50-7  | 771.11   | 1.64  | 9  | 13 | 13.15 | -1.75 | 0.3  |
| C133 | <i>P. ginseng</i> | ginsenoside Rc                                                                                        | 11021-14-0  | 1,079.43 | -0.69 | 14 | 22 | 8.13  | -3.86 | 0.04 |
| C134 | <i>P. ginseng</i> | ginsenoynes A                                                                                         | 139163-34-1 | 258.39   | 4.3   | 1  | 2  | 66.22 | 0.99  | 0.13 |
| C135 | <i>P. ginseng</i> | dianthramine                                                                                          | 136945-65-8 | 289.26   | 2.05  | 5  | 7  | 40.45 | -0.23 | 0.2  |
| C136 | <i>P. ginseng</i> | 2-formylpyrrole                                                                                       | 1003-29-8   | 95.11    | 0.97  | 1  | 1  | 41.58 | 1.12  | 0.01 |
| C137 | <i>P. ginseng</i> | $\beta$ -sitosterol                                                                                   | 83-46-5     | 414.79   | 8.08  | 1  | 1  | 36.91 | 1.32  | 0.75 |
| C138 | <i>P. ginseng</i> | (3R,5R,8R,9R,10R,12R,13R,14R,17S)-17-[(2S)-2-hydroxy-6-methylhept-5-en-2-yl]-4,4,8,10,14-pentamethyl- | 41753-43-9  | 460.82   | 5.79  | 3  | 3  | 29.69 | 0.35  | 0.77 |

|      |                   |                                                                                        |             |          |       |    |    |        |       |      |
|------|-------------------|----------------------------------------------------------------------------------------|-------------|----------|-------|----|----|--------|-------|------|
|      |                   | 2,3,5,6,7,9,11,12,13,15,16,17-dodecahydro-1H-cyclopenta[a]phenanthrene-3,12-diol       |             |          |       |    |    |        |       |      |
| C139 | <i>P. ginseng</i> | octane                                                                                 | 111-65-9    | 114.26   | 4.02  | 0  | 0  | 29.72  | 1.78  | 0.01 |
| C140 | <i>P. ginseng</i> | 2,6-dimethyl-3,7-octadiene-2,6-diol                                                    | 51276-34-7  | 170.28   | 1.33  | 2  | 2  | 52.4   | 0.47  | 0.03 |
| C141 | <i>P. ginseng</i> | 4-methyldodecane                                                                       | 6117-97-1   | 184.41   | 6.1   | 0  | 0  | 6.39   | 1.81  | 0.03 |
| C142 | <i>P. ginseng</i> | pangamic acid                                                                          | 11006-56-7  | 436.62   | 1.11  | 5  | 10 | 10.08  | -0.92 | 0.32 |
| C143 | <i>P. ginseng</i> | ginsenoside Re_qt                                                                      | 52286-59-6  | 476.82   | 4.62  | 4  | 4  | 20.13  | 0.27  | 0.78 |
| C144 | <i>P. ginseng</i> | ginsenoside Rs1_qt                                                                     | 68406-26-8  | 460.82   | 5.79  | 3  | 3  | 29.69  | 0.3   | 0.77 |
| C145 | <i>P. ginseng</i> | ginsenoynes C                                                                          | 139163-35-2 | 276.41   | 3.53  | 3  | 3  | 43.38  | 0.15  | 0.13 |
| C146 | <i>P. ginseng</i> | 12-O-nicotinoylisolineolone                                                            | N/A         | 469.63   | 1.32  | 3  | 7  | 20.7   | -0.54 | 0.83 |
| C147 | <i>P. ginseng</i> | celabenzine                                                                            | 53938-08-2  | 379.55   | 2.29  | 2  | 5  | 101.88 | 0.77  | 0.49 |
| C148 | <i>P. ginseng</i> | malonylginsenoside Rd                                                                  | N/A         | 1,033.35 | 0.71  | 12 | 21 | 8.84   | -3.72 | 0.07 |
| C149 | <i>P. ginseng</i> | 7 $\alpha$ -L-rhamnosyl-6-methoxylutcolin                                              | 35682-55-4  | 462.44   | 1.03  | 6  | 11 | 15.03  | -0.69 | 0.79 |
| C150 | <i>P. ginseng</i> | (1S,4E,8E,10R)-4,8,11,11-tetramethylbicyclo[8.1.0]undeca-4,8-diene                     | 24703-35-3  | 204.39   | 4.7   | 0  | 0  | 21.69  | 1.86  | 0.08 |
| C151 | <i>P. ginseng</i> | methylselenocysteine                                                                   | 26046-90-2  | 182.1    | -0.27 | 3  | 3  | 35.74  | 0.01  | 0.01 |
| C152 | <i>P. ginseng</i> | (2S,3R,4S,5S,6R)-2-[(2S)-2-[(3S,5R,8R,9R,10R,12R,13R,14R,17S)-3-[(2R,3R,4S,5S,6R)-4,5- | 52705-93-8  | 947.3    | 0.55  | 12 | 18 | 5.5    | -3.17 | 0.09 |

|      |                   |                                                                                                                                                                                                                                            |             |          |       |    |    |       |       |      |
|------|-------------------|--------------------------------------------------------------------------------------------------------------------------------------------------------------------------------------------------------------------------------------------|-------------|----------|-------|----|----|-------|-------|------|
|      |                   | dihydroxy-6-(hydroxymethyl)-3-<br>[(2 <i>S</i> ,3 <i>R</i> ,4 <i>S</i> ,5 <i>S</i> ,6 <i>R</i> )-3,4,5-trihydroxy-<br>6-(hydroxymethyl)oxan-2-<br>yl]oxyoxan-2-yl]oxy-12-hydroxy-<br>4,4,8,10,14-pentamethyl-<br>2,3,5,6,7,9,11,12,13,15,1 |             |          |       |    |    |       |       |      |
| C153 | <i>P. ginseng</i> | ginsenoside-Rh4                                                                                                                                                                                                                            | 174721-08-5 | 620.96   | 3.84  | 6  | 8  | 5.22  | -0.73 | 0.6  |
| C154 | <i>P. ginseng</i> | <i>N, N</i> -dimethyldecanamide                                                                                                                                                                                                            | 14433-76-2  | 199.38   | 3.44  | 0  | 2  | 55.5  | 1.51  | 0.04 |
| C155 | <i>P. ginseng</i> | vulgarin                                                                                                                                                                                                                                   | 3162-56-9   | 264.35   | 1.31  | 1  | 4  | 29.21 | 0.03  | 0.2  |
| C156 | <i>P. ginseng</i> | neocnidilide                                                                                                                                                                                                                               | 4567-33-3   | 194.3    | 3.37  | 0  | 2  | 83.83 | 1.23  | 0.07 |
| C157 | <i>P. ginseng</i> | ginsenoside-Rb2                                                                                                                                                                                                                            | 11021-13-9  | 1,079.43 | -0.69 | 14 | 22 | 6.02  | -3.92 | 0.04 |
| C158 | <i>P. ginseng</i> | ( <i>R</i> )-(+)-citronellal                                                                                                                                                                                                               | 2385-77-5   | 154.28   | 3.02  | 0  | 1  | 50.78 | 1.37  | 0.02 |
| C159 | <i>P. ginseng</i> | undecane-3,6-dimethyl                                                                                                                                                                                                                      | 17301-28-9  | 184.41   | 5.89  | 0  | 0  | 12.85 | 1.79  | 0.03 |
| C160 | <i>P. ginseng</i> | ginsenoside-Rh1                                                                                                                                                                                                                            | 63223-86-9  | 638.98   | 2.87  | 7  | 9  | 3.94  | -1.1  | 0.57 |
| C161 | <i>P. ginseng</i> | 20-hexadecanoylgingenol                                                                                                                                                                                                                    | N/A         | 586.94   | 7.38  | 3  | 6  | 28.2  | 0.3   | 0.68 |
| C162 | <i>P. ginseng</i> | ginsenoside Rg3_qt                                                                                                                                                                                                                         | 38243-03-7  | 460.82   | 5.86  | 3  | 3  | 14.83 | 0.49  | 0.77 |
| C163 | <i>P. ginseng</i> | cis-widdrol $\alpha$ -epoxide                                                                                                                                                                                                              | N/A         | 238.41   | 2.6   | 1  | 2  | 69.04 | 1.07  | 0.15 |
| C164 | <i>P. ginseng</i> | ginsenoside F1                                                                                                                                                                                                                             | 53963-43-2  | 638.98   | 2.94  | 7  | 9  | 4.05  | -1.24 | 0.61 |
| C165 | <i>P. ginseng</i> | dauricine                                                                                                                                                                                                                                  | 524-17-4    | 624.84   | 7.22  | 1  | 8  | 23.65 | 0.9   | 0.37 |
| C166 | <i>P. ginseng</i> | 3-[[ <i>(2S)</i> -2,4-dihydroxy-3,3-<br>dimethylbutanoyl]amino]propanoic<br>acid                                                                                                                                                           | 79-83-4     | 219.27   | -0.98 | 4  | 6  | 21.29 | -0.85 | 0.06 |



|      |                   |                                                                                       |             |          |       |    |       |       |       |      |
|------|-------------------|---------------------------------------------------------------------------------------|-------------|----------|-------|----|-------|-------|-------|------|
| C167 | <i>P. ginseng</i> | ginsenoside Rh3_qt                                                                    | 105558-26-7 | 456.83   | 7.21  | 2  | 2     | 8.06  | 1.04  | 0.78 |
| C168 | <i>P. ginseng</i> | ginsenoside Rh6                                                                       | N/A         | 670.98   | 1.88  | 8  | 11    | 6.46  | -1.67 | 0.55 |
| C169 | <i>P. ginseng</i> | ginsenoside Rc                                                                        | 11021-14-0  | 1,079.43 | -0.69 | 14 | 22    | 8.16  | -3.97 | 0.04 |
| C170 | <i>P. ginseng</i> | 7-( $\beta$ -xylosyl)cephalomannine                                                   | N/A         | 962.15   | 1.97  | 6  | 18    | 27.33 | -1.67 | 0.17 |
| C171 | <i>P. ginseng</i> | ginsenoside F2                                                                        | 62025-49-4  | 785.14   | 2.22  | 9  | 13    | 37.03 | -2.04 | 0.25 |
| C172 | <i>P. ginseng</i> | ginsenoside Rc_qt                                                                     | 11021-13-9  | 460.82   | 5.79  | 3  | 3     | 29.69 | 0.5   | 0.77 |
| C173 | <i>P. ginseng</i> | ginsenoside Rs2_qt                                                                    | 68406-26-8  | 460.82   | 5.79  | 3  | 3     | 29.69 | 0.3   | 0.77 |
| C174 | <i>P. ginseng</i> | 5-[(3aS,6R,6aR)-2-keto-1,3,3a,4,6,6a-hexahydrothieno[3,4-d]imidazol-6-yl]valeric acid | 22879-79-4  | 244.35   | 0.65  | 3  | 5     | 75.75 | -0.04 | 0.1  |
| C175 | <i>P. ginseng</i> | ginsenoside Ro_qt                                                                     | N/A         | 455.77   | 5.74  | 1  | 3     | 17.62 | 0.38  | 0.76 |
| C176 | <i>P. ginseng</i> | ginsenoside Rh5_qt                                                                    | N/A         | 474.80   | 4     | 4  | 12.22 | -0.08 | -0.92 | 0.26 |
| C177 | <i>P. ginseng</i> | ginsenoynes B                                                                         | 139035-29-3 | 294.85   | 4.74  | 2  | 2     | 39.79 | 0.79  | 0.13 |
| C178 | <i>P. ginseng</i> | (1R,4S,4aR,8aR)-4-isopropyl-1,6-dimethyl-3,4,4a,7,8,8a-hexahydro-2H-naphthalen-1-ol   | 481-34-5    | 222.41   | 3.78  | 1  | 1     | 31.67 | 1.32  | 0.09 |
| C179 | <i>P. ginseng</i> | methyl tricosanoate                                                                   | 2433-97-8   | 368.72   | 9.81  | 0  | 2     | 14.61 | 1.43  | 0.33 |
| C180 | <i>P. ginseng</i> | 3-O- $\beta$ -D-glucuronopyranosyl gypsogenin                                         | N/A         | 646.9    | 4.05  | 5  | 10    | 8.68  | -0.78 | 0.32 |
| C181 | <i>P. ginseng</i> | (Z,Z)- $\alpha$ -farnesene                                                            | 502-61-4    | 204.39   | 5.46  | 0  | 0     | 8.47  | 1.92  | 0.05 |
| C182 | <i>P. ginseng</i> | ginsenoside Rg5                                                                       | 186763-78-0 | 767.12   | 3.31  | 8  | 12    | 6.15  | -1.92 | 0.23 |
| C183 | <i>P. ginseng</i> | protopanaxadiol                                                                       | 7755-01-3   | 460.82   | 5.79  | 3  | 3     | 29.69 | 0.57  | 0.77 |

|      |                   |                                                                                                             |             |          |       |    |    |       |       |      |
|------|-------------------|-------------------------------------------------------------------------------------------------------------|-------------|----------|-------|----|----|-------|-------|------|
| C184 | <i>P. ginseng</i> | ginsenoside R0                                                                                              | 34367-04-9  | 957.24   | 1.07  | 11 | 19 | 2.1   | -3.57 | 0.04 |
| C185 | <i>P. ginseng</i> | kaempferol                                                                                                  | 520-18-3    | 286.25   | 1.77  | 4  | 6  | 41.88 | 0.26  | 0.24 |
| C186 | <i>P. ginseng</i> | ginsenoside Rg7                                                                                             | N/A         | 801.14   | 1.25  | 10 | 14 | 34    | -2.46 | 0.24 |
| C187 | <i>P. ginseng</i> | ginsenoside Ra2                                                                                             | 83459-42-1  | 1,211.56 | -1.92 | 16 | 26 | 7.62  | -4.43 | 0.02 |
| C188 | <i>P. ginseng</i> | ginsenoside Rh9                                                                                             | N/A         | 636.96   | 2.41  | 6  | 9  | 7.13  | -0.96 | 0.37 |
| C189 | <i>P. ginseng</i> | notoginsenoside R2                                                                                          | 80418-25-3  | 771.11   | 1.64  | 9  | 13 | 17.74 | -2.22 | 0.28 |
| C190 | <i>P. ginseng</i> | pancratistatin                                                                                              | 96203-70-2  | 325.3    | -1.94 | 6  | 9  | 13.13 | -1.17 | 0.46 |
| C191 | <i>P. ginseng</i> | methyl myristate                                                                                            | 124-10-7    | 242.45   | 5.71  | 0  | 2  | 19.68 | 1.36  | 0.08 |
| C192 | <i>P. ginseng</i> | (1 <i>R</i> ,4 <i>E</i> ,7 <i>E</i> ,11 <i>R</i> )-1,5,9,9-tetramethyl-12-oxabicyclo[9.1.0]dodeca-4,7-diene | 19888-33-6  | 220.39   | 3.8   | 0  | 1  | 23.66 | 1.58  | 0.1  |
| C193 | <i>P. ginseng</i> | $\epsilon$ -cadinene                                                                                        | N/A         | 204.39   | 4.85  | 0  | 0  | 16.41 | 1.82  | 0.08 |
| C194 | <i>P. ginseng</i> | ginsenoside Rg7_qt                                                                                          | 114019-97-5 | 476.82   | 4.74  | 4  | 4  | 10.73 | -0.02 | 0.79 |
| C195 | <i>P. ginseng</i> | chrysanthemaxanthin                                                                                         | 27780-11-6  | 584.96   | 8.24  | 2  | 3  | 38.72 | 0.51  | 0.58 |
| C196 | <i>P. ginseng</i> | darutoside                                                                                                  | 19716-26-8  | 574.93   | 5.89  | 4  | 6  | 21.32 | -0.26 | 0.63 |
| C197 | <i>P. ginseng</i> | ginsenoside Rh2_qt                                                                                          | N/A         | 460.82   | 5.79  | 3  | 3  | 29.69 | 0.47  | 0.77 |
| C198 | <i>P. ginseng</i> | notoginsenoside R6                                                                                          | N/A         | 963.3    | -0.62 | 13 | 19 | 4.7   | -3.46 | 0.12 |
| C199 | <i>P. ginseng</i> | ginsenoside Rb3_qt                                                                                          | 80330-77-4  | 460.82   | 5.79  | 3  | 3  | 29.69 | 0.33  | 0.77 |
| C200 | <i>P. ginseng</i> | ginsenoside Rg3_qt                                                                                          | N/A         | 460.82   | 5.79  | 3  | 3  | 29.69 | 0.31  | 0.77 |
| C201 | <i>P. ginseng</i> | L-erythro-isocitric acid                                                                                    | 30810-51-6  | 192.14   | -1.34 | 4  | 7  | 32.95 | -1.46 | 0.04 |
| C202 | <i>P. ginseng</i> | ( <i>Z</i> )-2-methyl-5-[(1 <i>S</i> ,2 <i>R</i> ,4 <i>R</i> )-2-methyl-3-methylene-2-                      | 77-42-9     | 220.39   | 3.66  | 1  | 1  | 35.28 | 1.28  | 0.09 |

|      |                   |                                                                                                                    |             |          |       |    |    |       |       |      |
|------|-------------------|--------------------------------------------------------------------------------------------------------------------|-------------|----------|-------|----|----|-------|-------|------|
|      |                   | norbornanyl]pent-2-en-1-ol                                                                                         |             |          |       |    |    |       |       |      |
| C203 | <i>P. ginseng</i> | 2-methyltridecane                                                                                                  | 1560-96-9   | 198.44   | 6.55  | 0  | 0  | 5.75  | 1.81  | 0.04 |
| C204 | <i>P. ginseng</i> | suffruticoside A_qt1                                                                                               | N/A         | 302.26   | -0.93 | 6  | 9  | 13.9  | -1.35 | 0.2  |
| C205 | <i>P. ginseng</i> | 3,5-dimethyl- <i>p</i> -anisic acid                                                                                | 21553-46-8  | 180.22   | 2.39  | 1  | 3  | 61.11 | 0.75  | 0.05 |
| C206 | <i>P. ginseng</i> | 3-methylundecane                                                                                                   | 1002-43-3   | 170.38   | 5.64  | 0  | 0  | 6.57  | 1.79  | 0.02 |
| C207 | <i>P. ginseng</i> | deoxyharringtonine                                                                                                 | 36804-95-2  | 515.66   | 3.13  | 1  | 9  | 39.27 | 0.19  | 0.81 |
| C208 | <i>P. ginseng</i> | methyl stearate                                                                                                    | 112-61-8    | 298.57   | 7.53  | 0  | 2  | 16.8  | 1.41  | 0.16 |
| C209 | <i>P. ginseng</i> | ginsenoside Ra0                                                                                                    | N/A         | 1,271.62 | -2.94 | 18 | 28 | 7.3   | -5.56 | 0.01 |
| C210 | <i>P. ginseng</i> | frutinone A                                                                                                        | 38210-27-4  | 264.24   | 2.7   | 0  | 4  | 65.9  | 0.89  | 0.34 |
| C211 | <i>P. ginseng</i> | ginsenoside Rh2                                                                                                    | 78214-33-2  | 622.98   | 4.04  | 6  | 8  | 36.32 | -0.51 | 0.56 |
| C212 | <i>P. ginseng</i> | $\gamma$ -selinene                                                                                                 | 515-17-3    | 204.39   | 4.95  | 0  | 0  | 22.58 | 1.84  | 0.08 |
|      |                   | (3 <i>S</i> ,5 <i>R</i> ,8 <i>R</i> ,9 <i>R</i> ,10 <i>R</i> ,12 <i>R</i> ,13 <i>R</i> ,14 <i>R</i> ,17 <i>S</i> ) |             |          |       |    |    |       |       |      |
|      |                   | -17-[(2 <i>S</i> )-2-hydroxy-6-methylhept-                                                                         |             |          |       |    |    |       |       |      |
|      |                   | 5-en-2-yl]-4,4,8,10,14-pentamethyl-                                                                                |             |          |       |    |    |       |       |      |
| C213 | <i>P. ginseng</i> | 2,3,5,6,7,9,11,12,13,15,16,17-                                                                                     | N/A         | 460.82   | 5.79  | 3  | 3  | 29.69 | 0.37  | 0.77 |
|      |                   | dodecahydro-1H-                                                                                                    |             |          |       |    |    |       |       |      |
|      |                   | cyclopenta[ <i>a</i> ]phenanthrene-3,12-                                                                           |             |          |       |    |    |       |       |      |
|      |                   | diol                                                                                                               |             |          |       |    |    |       |       |      |
|      |                   | (2 <i>R</i> ,3 <i>S</i> ,4 <i>S</i> ,5 <i>R</i> ,6 <i>R</i> )-2-                                                   |             |          |       |    |    |       |       |      |
| C214 | <i>P. ginseng</i> | (hydroxymethyl)-6-                                                                                                 | 105558-26-7 | 604.96   | 5.01  | 5  | 7  | 12.09 | -0.35 | 0.59 |
|      |                   | [[[(3 <i>S</i> ,5 <i>R</i> ,8 <i>R</i> ,9 <i>R</i> ,10 <i>R</i> ,12 <i>R</i> ,13 <i>R</i> ,14 <i>R</i> ,1          |             |          |       |    |    |       |       |      |
|      |                   | 7 <i>S</i> )-12-hydroxy-4,4,8,10,14-                                                                               |             |          |       |    |    |       |       |      |

---

|      |                   |                                                                                                                                                    |             |          |      |    |    |       |       |      |
|------|-------------------|----------------------------------------------------------------------------------------------------------------------------------------------------|-------------|----------|------|----|----|-------|-------|------|
|      |                   | pentamethyl-17-[(2Z)-6-methylhepta-2,5-dien-2-yl]-2,3,5,6,7,9,11,12,13,15,16,17-dodecahydro-1H-cyclopenta[a]phenanthren-3-yl]oxy]oxane-3,4,5-triol |             |          |      |    |    |       |       |      |
| C215 | <i>P. ginseng</i> | ginsenoside Rd2_qt                                                                                                                                 | 68406-26-8  | 460.82   | 5.79 | 3  | 3  | 29.69 | 0.3   | 0.77 |
| C216 | <i>P. ginseng</i> | ginsenoside Rg1                                                                                                                                    | 22427-39-0  | 801.14   | 1.13 | 10 | 14 | 9.03  | -2.24 | 0.28 |
| C217 | <i>P. ginseng</i> | notoginsenoside Fe_qt                                                                                                                              | N/A         | 460.82   | 5.79 | 3  | 3  | 29.69 | 0.33  | 0.77 |
| C218 | <i>P. ginseng</i> | ginsenoside Rh7                                                                                                                                    | N/A         | 636.96   | 2.69 | 6  | 9  | 7.72  | -1.17 | 0.6  |
| C219 | <i>P. ginseng</i> | diisooctyl phthalate                                                                                                                               | 27554-26-3  | 390.62   | 7.44 | 0  | 4  | 43.59 | 0.79  | 0.39 |
| C220 | <i>P. ginseng</i> | $\beta$ -elemene                                                                                                                                   | 87-44-5     | 204.39   | 4.79 | 0  | 0  | 25.63 | 1.84  | 0.06 |
| C221 | <i>P. ginseng</i> | ginsenoside Ro                                                                                                                                     | 34367-04-9  | 957.24   | 1.23 | 11 | 19 | 1.98  | -2.86 | 0.05 |
| C222 | <i>P. ginseng</i> | suchilactone                                                                                                                                       | 50816-74-5  | 368.41   | 3.73 | 0  | 6  | 57.52 | 0.82  | 0.56 |
| C223 | <i>P. ginseng</i> | ginsenoside F1_qt                                                                                                                                  | 53963-43-2  | 476.82   | 4.69 | 4  | 4  | 9.67  | 0.07  | 0.79 |
| C224 | <i>P. ginseng</i> | ginsenoside Rh1                                                                                                                                    | 63223-86-9  | 638.98   | 2.87 | 7  | 9  | 3.86  | -1.17 | 0.57 |
| C225 | <i>P. ginseng</i> | inermin                                                                                                                                            | 19908-48-6  | 284.28   | 2.44 | 1  | 5  | 65.83 | 0.91  | 0.54 |
| C226 | <i>P. ginseng</i> | (+)-maalioxide                                                                                                                                     | 53625-18-6  | 222.41   | 3.47 | 0  | 1  | 55.93 | 1.59  | 0.13 |
| C227 | <i>P. ginseng</i> | 6,8-nonacosanediol                                                                                                                                 | 96850-33-8  | 188.35   | 2.79 | 2  | 2  | 17.79 | 0.56  | 0.03 |
| C228 | <i>P. ginseng</i> | ginsenoside Rb1                                                                                                                                    | 41753-43-9  | 1,109.46 | -1.2 | 15 | 23 | 6.24  | -3.99 | 0.04 |
| C229 | <i>P. ginseng</i> | ginsenoyne E                                                                                                                                       | 126146-63-2 | 258.39   | 4.93 | 0  | 2  | 36.53 | 1.05  | 0.13 |
| C230 | <i>P. ginseng</i> | 2,6,10,15-tetramethylheptadecane                                                                                                                   | 54833-48-6  | 296.65   | 9.13 | 0  | 0  | 13.73 | 1.85  | 0.13 |

---

|      |                   |                               |             |        |       |    |    |       |       |      |
|------|-------------------|-------------------------------|-------------|--------|-------|----|----|-------|-------|------|
| C231 | <i>P. ginseng</i> | 7-tetradecyne                 | 35216-11-6  | 194.4  | 6.44  | 0  | 0  | 20.07 | 1.93  | 0.04 |
| C232 | <i>P. ginseng</i> | acetal                        | 73506-93-1  | 118.2  | 0.78  | 0  | 2  | 26.4  | 1.25  | 0.01 |
| C233 | <i>P. ginseng</i> | oleanane                      | 471-67-0    | 412.82 | 8.66  | 0  | 0  | 6.69  | 1.83  | 0.76 |
| C234 | <i>P. ginseng</i> | panaxytriol                   | 87005-03-6  | 278.43 | 3.92  | 3  | 3  | 33.76 | 0.06  | 0.13 |
| C235 | <i>P. ginseng</i> | gomisin B                     | 58546-55-7  | 514.62 | 2.73  | 1  | 9  | 31.99 | 0.6   | 0.83 |
| C236 | <i>P. ginseng</i> | fumarine                      | 130-86-9    | 353.4  | 2.95  | 0  | 6  | 59.26 | 0.56  | 0.83 |
| C237 | <i>P. ginseng</i> | ginsenoside Rs1_qt            | 68406-26-8  | 460.82 | 5.79  | 3  | 3  | 29.69 | 0.3   | 0.77 |
| C238 | <i>P. ginseng</i> | loxanol V                     | 112-72-1    | 214.44 | 5.53  | 1  | 1  | 14.19 | 1.27  | 0.05 |
| C239 | <i>P. ginseng</i> | ginsenoside Rh7_qt            | N/A         | 474.8  | 4.44  | 3  | 4  | 29.23 | 0.08  | 0.78 |
| C240 | <i>P. ginseng</i> | trifolirhizin                 | 6807-83-6   | 446.44 | 0.54  | 4  | 10 | 7.62  | -0.83 | 0.79 |
| C241 | <i>P. ginseng</i> | ginsenoside Rd                | 52705-93-8  | 963.15 | 1.06  | 11 | 17 | 5.02  | -3.05 | 0.11 |
| C242 | <i>P. ginseng</i> | argininyl-fructosyl-glucose   | N/A         | 498.56 | -4.63 | 13 | 16 | 0.74  | -3.12 | 0.62 |
| C243 | <i>P. ginseng</i> | ginsenoside-Ra2_qt            | 68406-26-8  | 460.82 | 5.79  | 3  | 3  | 29.69 | 0.3   | 0.77 |
| C244 | <i>P. ginseng</i> | ginsenoside Rg2               | 80952-72-3  | 785.14 | 2.02  | 9  | 13 | 10.09 | -1.96 | 0.26 |
| C245 | <i>P. ginseng</i> | ginsenoside F3_qt             | 62025-50-7  | 476.82 | 4.62  | 4  | 4  | 20.13 | 0.02  | 0.78 |
| C246 | <i>P. ginseng</i> | ginsenoside Rb2_qt            | 11021-13-9  | 460.82 | 5.79  | 3  | 3  | 29.69 | 0.5   | 0.77 |
| C247 | <i>P. ginseng</i> | 6'-malonylginsenoside Rd1_qt1 | N/A         | 460.82 | 5.79  | 3  | 3  | 29.69 | 0.56  | 0.77 |
| C248 | <i>P. ginseng</i> | ginsenoside La                | 123617-34-5 | 783.12 | 1.84  | 8  | 13 | 17.74 | -1.9  | 0.14 |
| C249 | <i>P. ginseng</i> | ginsenoside Rd2               | 83480-64-2  | 917.27 | 1.05  | 11 | 17 | 5.01  | -3.05 | 0.11 |
| C250 | <i>P. ginseng</i> | $\delta$ -elemene             | 20307-84-0  | 204.39 | 4.73  | 0  | 0  | 25.99 | 1.84  | 0.06 |
| C251 | <i>P. ginseng</i> | ginsenoside Rh4_qt            | 174721-08-5 | 458.8  | 5.59  | 3  | 3  | 9.84  | 0.36  | 0.78 |
| C252 | <i>P. ginseng</i> | maltose                       | 133-99-3    | 342.34 | -4.26 | 8  | 11 | 1.8   | -2.7  | 0.24 |

|      |                   |                           |             |          |       |    |    |       |       |      |
|------|-------------------|---------------------------|-------------|----------|-------|----|----|-------|-------|------|
| C253 | <i>P. ginseng</i> | stigmasterol              | 83-48-7     | 412.77   | 7.64  | 1  | 1  | 43.83 | 1.44  | 0.76 |
| C254 | <i>P. ginseng</i> | pentadecane               | 629-62-9    | 212.47   | 7.22  | 0  | 0  | 13.98 | 1.81  | 0.05 |
| C255 | <i>P. ginseng</i> | arachidonate              | 506-32-1    | 304.52   | 6.41  | 1  | 2  | 45.57 | 1.27  | 0.2  |
| C256 | <i>P. ginseng</i> | ginsenoside Rg5_qt        | N/A         | 442.8    | 6.8   | 2  | 2  | 39.56 | 0.88  | 0.79 |
| C257 | <i>P. ginseng</i> | ginsenoside Rd_qt         | 62025-49-4  | 460.82   | 5.79  | 3  | 3  | 12.23 | 0.65  | 0.77 |
| C258 | <i>P. ginseng</i> | ginsenoside Ra0_qt        | N/A         | 460.82   | 5.79  | 3  | 3  | 29.69 | 0.3   | 0.77 |
| C259 | <i>P. ginseng</i> | malonylginsenoside Rc_qt1 | N/A         | 460.82   | 5.79  | 3  | 3  | 29.69 | 0.45  | 0.77 |
| C260 | <i>P. ginseng</i> | alexandrin_qt             | N/A         | 414.79   | 8.08  | 1  | 1  | 36.91 | 1.3   | 0.75 |
| C261 | <i>P. ginseng</i> | notoginsenoside R2_qt     | N/A         | 476.82   | 4.62  | 4  | 4  | 20.13 | 0.2   | 0.78 |
| C262 | <i>P. ginseng</i> | ginsenoside Rh1_qt        | N/A         | 476.82   | 4.62  | 4  | 4  | 20.13 | -0.02 | 0.78 |
| C263 | <i>P. ginseng</i> | mycosinol                 | 111768-19-5 | 214.23   | 1.46  | 1  | 3  | 82.12 | 0.87  | 0.09 |
| C264 | <i>P. ginseng</i> | ginsenoside Rh4_qt        | N/A         | 458.8    | 5.59  | 3  | 3  | 31.11 | 0.5   | 0.78 |
| C265 | <i>P. ginseng</i> | ginsenoside Rh6_qt        | N/A         | 508.82   | 3.63  | 5  | 6  | 10.51 | -0.56 | 0.8  |
| C266 | <i>P. ginseng</i> | 3-ethyl-3-methylheptane   | 17302-01-1  | 142.32   | 4.48  | 0  | 0  | 37.33 | 1.81  | 0.02 |
| C267 | <i>P. ginseng</i> | aposiopolamine            | N/A         | 271.34   | 1.39  | 1  | 4  | 66.65 | 0.66  | 0.22 |
| C268 | <i>P. ginseng</i> | ginsenoside Rs1           | 87733-67-3  | 1,121.47 | -0.31 | 13 | 23 | 6.27  | -3.69 | 0.04 |
| C269 | <i>P. ginseng</i> | ginsenoside Rs1           | 87733-67-3  | 1,121.47 | -0.31 | 13 | 23 | 6.27  | -3.69 | 0.04 |
| C270 | <i>P. ginseng</i> | malonylginsenoside Rc     | N/A         | 1,165.48 | -0.52 | 14 | 25 | 7.84  | -4.27 | 0.03 |
| C271 | <i>P. ginseng</i> | linoleic                  | 60-33-3     | 280.5    | 6.39  | 1  | 2  | 41.9  | 1.23  | 0.14 |
| C272 | <i>P. ginseng</i> | dammarane                 | 545-22-2    | 414.84   | 9.53  | 0  | 0  | 19.73 | 1.81  | 0.7  |
| C273 | <i>P. ginseng</i> | 13-tetradecenyl acetate   | 56221-91-1  | 254.46   | 5.52  | 0  | 2  | 36.76 | 1.36  | 0.1  |
| C274 | <i>P. ginseng</i> | ginsenoside Ra3_qt        | 68406-26-8  | 460.82   | 5.79  | 3  | 3  | 29.69 | 0.3   | 0.77 |

|      |                   |                                                                                                                                                                                                                                  |            |          |       |    |    |       |       |      |
|------|-------------------|----------------------------------------------------------------------------------------------------------------------------------------------------------------------------------------------------------------------------------|------------|----------|-------|----|----|-------|-------|------|
| C275 | <i>P. ginseng</i> | ginsenoside Rb3                                                                                                                                                                                                                  | 68406-26-8 | 1,079.43 | -0.69 | 14 | 22 | 7.84  | -3.98 | 0.04 |
| C276 | <i>P. ginseng</i> | panaxadiol                                                                                                                                                                                                                       | 19666-76-3 | 460.82   | 5.46  | 2  | 3  | 33.09 | 0.82  | 0.79 |
| C277 | <i>P. ginseng</i> | malkangunin                                                                                                                                                                                                                      | 52691-06-2 | 432.56   | 1.84  | 2  | 7  | 57.71 | 0.22  | 0.63 |
| C278 | <i>P. ginseng</i> | 5-methyl-tetradecane                                                                                                                                                                                                             | 25117-32-2 | 212.47   | 7.01  | 0  | 0  | 16.15 | 1.83  | 0.05 |
| C279 | <i>P. ginseng</i> | (4a <i>S</i> ,6a <i>R</i> ,6a <i>S</i> ,6b <i>R</i> ,8a <i>R</i> ,10 <i>S</i> ,12a <i>R</i> ,14b <i>R</i> )-10-hydroxy-2,2,6a,6b,9,9,12a-heptamethyl-1,3,4,5,6,6a,7,8,8a,10,11,12,13,14b-tetradecahydronicene-4a-carboxylic acid | 6892-79-1  | 456.78   | 6.42  | 2  | 3  | 14.36 | 0.6   | 0.76 |
| C280 | <i>P. ginseng</i> | 5-heptadec-12-enylresorcinol                                                                                                                                                                                                     | N/A        | 346.61   | 8.64  | 2  | 2  | 3.29  | 1.38  | 0.32 |
| C281 | <i>P. ginseng</i> | methyl palmitelaidate                                                                                                                                                                                                            | 10030-74-7 | 268.49   | 6.17  | 0  | 2  | 34.61 | 1.4   | 0.12 |
| C282 | <i>P. ginseng</i> | pentadecylic acid                                                                                                                                                                                                                | 1002-84-2  | 242.45   | 5.91  | 1  | 2  | 20.18 | 1.08  | 0.08 |
| C283 | <i>P. ginseng</i> | ginsenoside Rf                                                                                                                                                                                                                   | 52286-58-5 | 801.14   | 1.13  | 10 | 14 | 15.33 | -2.12 | 0.24 |
| C284 | <i>P. ginseng</i> | 16-oxoseratenediol                                                                                                                                                                                                               | 24513-51-7 | 456.78   | 5.52  | 2  | 3  | 15.1  | 0.4   | 0.75 |
| C285 | <i>P. ginseng</i> | $\alpha$ -cubebol                                                                                                                                                                                                                | 81-34-5    | 208.38   | 3.28  | 1  | 1  | 64.81 | 1.32  | 0.09 |
| C286 | <i>P. ginseng</i> | octanal                                                                                                                                                                                                                          | 124-13-0   | 128.24   | 2.77  | 0  | 1  | 19.07 | 1.3   | 0.01 |
| C287 | <i>P. ginseng</i> | 2-heptodecanone                                                                                                                                                                                                                  | 2922-51-2  | 254.51   | 6.35  | 0  | 1  | 15.31 | 1.49  | 0.09 |
| C288 | <i>P. ginseng</i> | gomisin A                                                                                                                                                                                                                        | 58546-54-6 | 416.51   | 3.85  | 1  | 7  | 30.69 | 0.63  | 0.78 |
| C289 | <i>P. ginseng</i> | raffinose                                                                                                                                                                                                                        | 17629-30-0 | 504.5    | -6.06 | 11 | 16 | 11.79 | -3.91 | 0.66 |
| C290 | <i>P. ginseng</i> | campesterol                                                                                                                                                                                                                      | 474-62-4   | 400.76   | 7.63  | 1  | 1  | 37.58 | 1.34  | 0.71 |
| C291 | <i>P. ginseng</i> | heptadekan                                                                                                                                                                                                                       | 629-78-7   | 240.53   | 8.13  | 0  | 0  | 8.64  | 1.84  | 0.07 |

|      |                   |                       |            |          |       |    |    |       |       |      |
|------|-------------------|-----------------------|------------|----------|-------|----|----|-------|-------|------|
| C292 | <i>P. ginseng</i> | eicosane              | 112-95-8   | 282.62   | 9.5   | 0  | 0  | 8.46  | 1.83  | 0.13 |
| C293 | <i>P. ginseng</i> | calarene              | 17334-55-3 | 236.39   | 3.44  | 1  | 2  | 16.81 | 1     | 0.14 |
| C294 | <i>P. ginseng</i> | xylose                | 6763-34-4  | 150.15   | -2    | 4  | 5  | 58.74 | -1.16 | 0.03 |
| C295 | <i>P. ginseng</i> | spermine              | 115-04-8   | 202.4    | -1.5  | 6  | 4  | 26.81 | -0.21 | 0.04 |
| C296 | <i>P. ginseng</i> | choline               | 62-49-7    | 104.2    | -1.57 | 1  | 1  | 0.47  | 0.86  | 0.01 |
| C297 | <i>P. ginseng</i> | $\delta$ -cadinol     | 91-17-8    | 204.39   | 4.94  | 0  | 0  | 17.13 | 1.87  | 0.08 |
| C298 | <i>P. ginseng</i> | girinimbin            | 23095-44-5 | 263.36   | 4.6   | 1  | 1  | 61.22 | 1.72  | 0.31 |
| C299 | <i>P. ginseng</i> | pyrrole-2-Aldehyde    | 1003-29-8  | 95.11    | 0.97  | 1  | 1  | 41.58 | 1.12  | 0.01 |
| C300 | <i>P. ginseng</i> | ramalic acid          | 500-37-8   | 346.36   | 3.77  | 3  | 7  | 6     | 0.35  | 0.3  |
| C301 | <i>P. ginseng</i> | trifolin              | 23627-87-4 | 448.41   | -0.32 | 7  | 11 | 3.1   | -1.17 | 0.74 |
| C302 | <i>P. ginseng</i> | rhamnose              | 4469-18-5  | 164.18   | -1.8  | 4  | 5  | 40.73 | -1.3  | 0.03 |
| C303 | <i>P. ginseng</i> | apohyoscine           | 535-26-2   | 285.37   | 1.93  | 0  | 4  | 59.68 | 0.84  | 0.25 |
| C304 | <i>P. ginseng</i> | $\delta$ -guaiene     | 88-84-6    | 204.39   | 5.13  | 0  | 0  | 28.21 | 1.83  | 0.07 |
| C305 | <i>P. ginseng</i> | pentadecanoic acid    | 1002-84-2  | 242.45   | 5.91  | 1  | 2  | 20.18 | 1.08  | 0.08 |
| C306 | <i>P. ginseng</i> | pseudohypericin       | 55954-61-5 | 520.46   | 3.8   | 7  | 9  | 16.94 | -0.2  | 0.07 |
| C307 | <i>P. ginseng</i> | guanosine             | 118-00-3   | 283.28   | -2.41 | 6  | 9  | 21.43 | -1.21 | 0.21 |
| C308 | <i>P. ginseng</i> | notoginsenoside R4    | N/A        | 1,241.59 | -2.43 | 17 | 27 | 7.32  | -4.91 | 0.02 |
| C309 | <i>P. ginseng</i> | notoginsenoside R4 qt | N/A        | 460.82   | 5.79  | 3  | 3  | 29.69 | 0.4   | 0.78 |
| C310 | <i>P. ginseng</i> | deoxygomisin A        | 82467-52-5 | 400.51   | 5.07  | 0  | 6  | 20.16 | 1.01  | 0.75 |
| C311 | <i>P. ginseng</i> | <i>n</i> -tridecane   | 629-50-5   | 184.41   | 6.3   | 0  | 0  | 17.89 | 1.78  | 0.03 |
| C312 | <i>P. ginseng</i> | dianthoside           | 20847-13-6 | 288.28   | -2.66 | 4  | 8  | 1.99  | -0.97 | 0.17 |
| C313 | <i>P. ginseng</i> | humulene              | 19132-75-3 | 204.39   | 5.04  | 0  | 0  | 22.98 | 1.88  | 0.06 |



|      |                   |                    |             |        |       |    |    |       |       |      |
|------|-------------------|--------------------|-------------|--------|-------|----|----|-------|-------|------|
| C314 | <i>P. ginseng</i> | dibutyl phthalate  | 84-74-2     | 278.38 | 4.2   | 0  | 4  | 64.54 | 0.8   | 0.13 |
| C315 | <i>P. ginseng</i> | bicyclogermacrene  | 67650-90-2  | 204.39 | 4.7   | 0  | 0  | 27.33 | 1.85  | 0.08 |
| C316 | <i>P. ginseng</i> | notoginsenoside R1 | 80418-24-2  | 933.27 | -0.11 | 12 | 18 | 4.27  | -2.57 | 0.13 |
| C317 | <i>P. ginseng</i> | spermidine         | 124-20-9    | 145.29 | -1.17 | 5  | 3  | 45.41 | -0.12 | 0.02 |
| C318 | <i>P. ginseng</i> | palmitoleicacid    | 373-49-9    | 254.46 | 5.92  | 1  | 2  | 35.78 | 1.18  | 0.1  |
| C319 | <i>P. ginseng</i> | riboflavine        | 130609-39-1 | 376.41 | 0.23  | 5  | 10 | 18.18 | -1.52 | 0.5  |
| C320 | <i>P. ginseng</i> | daucosterol        | 474-58-8    | 576.95 | 6.34  | 4  | 6  | 20.63 | 0.03  | 0.63 |
| C321 | <i>P. ginseng</i> | menthyl acetate    | 29066-34-0  | 198.34 | 3.16  | 0  | 2  | 22.24 | 1.23  | 0.05 |
| C322 | <i>P. ginseng</i> | putrescine         | 1071-98-3   | 88.18  | -0.83 | 4  | 2  | 81.23 | -0.08 | 0    |

MW: molecular weight, CLogP: Calculated octanol-water partition coeff., nHdon: number of donor atoms for H-bonds, nHacc: number of acceptor atoms for H-bonds, OB: oral bioavailability, Caco-2: the calculated intestinal epithelial permeability, DL: drug likeness.

\_qt represents the molecule with deglycosylation.

**Supplementary Table S2** The information of synthetic drugs used for treatment of ulcerative colitis (UC).

| <b>ID</b> | <b>Drug</b>        | <b>CAS</b>   | <b>MW</b> | <b>CLogP</b> | <b>nHDon</b> | <b>nHAc</b> |
|-----------|--------------------|--------------|-----------|--------------|--------------|-------------|
| D1        | Tetomilast         | 145739-56-6  | 370.42    | 4.3          | 1            | 6           |
| D2        | Rivanicline        | 15585-43-0   | 162.23    | 1.21         | 1            | 2           |
| D3        | Olsalazine         | 15722-48-2   | 302.23    | 4.39         | 4            | 8           |
| D4        | Balsalazide        | 80573-04-2   | 357.32    | 3.17         | 4            | 8           |
| D5        | Ozanimod           | 1306760-87-1 | 404.47    | 3.96         | 2            | 6           |
| D6        | Clindamycin        | 18323-44-9   | 424.98    | 1.09         | 4            | 7           |
| D7        | ORE-1001           | 305335-31-3  | 428.31    | -0.9         | 3            | 6           |
| D8        | Elubrixin          | 688763-64-6  | 463.31    | 1.64         | 4            | 5           |
| D9        | Sulfasalazine      | 599-79-1     | 398.39    | 3.94         | 3            | 8           |
| D10       | Budesonide         | 51333-22-3   | 430.53    | 2.73         | 2            | 6           |
| D11       | Prednisolone       | 50-24-8      | 360.44    | 1.27         | 3            | 5           |
| D12       | Azathioprine       | 446-86-6     | 277.26    | 1.17         | 1            | 6           |
| D13       | Mesalazine         | 89-57-6      | 153.14    | -0.29        | 3            | 4           |
| D14       | Metronidazole      | 443-48-1     | 171.15    | -0.46        | 1            | 4           |
| D15       | Prednisone         | 53-03-2      | 358.48    | 1.66         | 2            | 5           |
| D16       | Tofacitinib        | 477600-75-2  | 312.37    | 1.24         | 1            | 5           |
| D17       | Hydrocortisone     | 50-23-7      | 362.46    | 1.28         | 3            | 5           |
| D18       | Cortisone acetate  | 50-04-4      | 402.48    | 2.1          | 1            | 5           |
| D19       | Dexamethasone      | 50-02-2      | 392.46    | 1.68         | 3            | 5           |
| D20       | Methylprednisolone | 83-43-2      | 374.47    | 1.56         | 3            | 5           |
| D21       | Mercaptopurine     | 50-44-2      | 152.18    | -0.12        | 2            | 3           |
| D22       | Triamcinolone      | 124-94-7     | 394.43    | 0.24         | 4            | 6           |

**Supplementary Table S3** Active ingredients and ADME parameters of Renshen and Baizhu.

| No.             | Compound name                                | Structure                                                                           | OB (%) | DL   | Herb                      |
|-----------------|----------------------------------------------|-------------------------------------------------------------------------------------|--------|------|---------------------------|
| M1              | (24 <i>S</i> )-24-propylcholesta-5-ene-3β-ol | 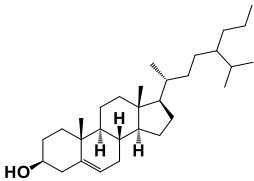   | 36.23  | 0.78 | A.<br><i>macrocephala</i> |
| M2              | 3β-acetoxyatractylone                        |    | 54.07  | 0.22 | A.<br><i>macrocephala</i> |
| M3              | 8β-ethoxyatractylenolide III                 |    | 35.95  | 0.21 | A.<br><i>macrocephala</i> |
| M4 <sup>#</sup> | atractylenolide I                            |    | 37.37  | 0.15 | A.<br><i>macrocephala</i> |
| M5 <sup>#</sup> | atractylenolide II                           |   | 47.5   | 0.15 | A.<br><i>macrocephala</i> |
| M6              | atractylenolide III                          |  | 68.11  | 0.17 | A.<br><i>macrocephala</i> |
| M7 <sup>#</sup> | atractylone                                  |  | 41.1   | 0.13 | A.<br><i>macrocephala</i> |
| M8              | α-amyrin                                     |  | 39.51  | 0.76 | A.<br><i>macrocephala</i> |
| M9 <sup>#</sup> | β-eudesmol                                   |  | 26.09  | 0.10 | A.<br><i>macrocephala</i> |

|                  |                             |                                                                                     |        |      |                                                  |
|------------------|-----------------------------|-------------------------------------------------------------------------------------|--------|------|--------------------------------------------------|
| M10 <sup>#</sup> | $\beta$ -caryophyllene      | 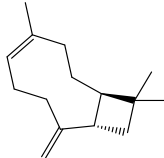   | 29.7   | 0.09 | A.<br><i>macrocephala</i><br>& <i>P. ginseng</i> |
| M11 <sup>#</sup> | araloside A                 |    | 16.96  | 0.06 | <i>P. ginseng</i>                                |
| M12              | celabenzine                 |    | 101.88 | 0.49 | <i>P. ginseng</i>                                |
| M13              | chrysanthemaxanthin         |   | 38.72  | 0.58 | <i>P. ginseng</i>                                |
| M14 <sup>#</sup> | dauricine                   |  | 23.65  | 0.37 | <i>P. ginseng</i>                                |
| M15 <sup>#</sup> | argininyl-fructosyl-glucose |  | 0.74   | 0.62 | <i>P. ginseng</i>                                |
| M16              | dianthramine                |  | 40.45  | 0.2  | <i>P. ginseng</i>                                |

|                  |                      |                                                                                     |       |      |                   |
|------------------|----------------------|-------------------------------------------------------------------------------------|-------|------|-------------------|
| M17 <sup>#</sup> | diisooctyl phthalate | 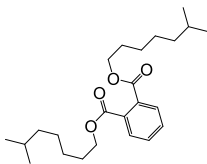   | 6.24  | 0.04 | <i>P. ginseng</i> |
| M18 <sup>#</sup> | folinic acid         |    | 23.6  | 0.74 | <i>P. ginseng</i> |
| M19              | frutinone A          |    | 65.9  | 0.34 | <i>P. ginseng</i> |
| M20              | fumarine             |    | 59.26 | 0.83 | <i>P. ginseng</i> |
| M21 <sup>#</sup> | ginsenoside Rb1      |   | 6.24  | 0.04 | <i>P. ginseng</i> |
| M22 <sup>#</sup> | ginsenoside Rb2      |  | 5.98  | 0.04 | <i>P. ginseng</i> |
| M23 <sup>#</sup> | ginsenoside Rb3      |  | 29.69 | 0.77 | <i>P. ginseng</i> |

---

|                  |                 |                                                                                     |       |      |                   |
|------------------|-----------------|-------------------------------------------------------------------------------------|-------|------|-------------------|
| M24 <sup>#</sup> | ginsenoside Rc  | 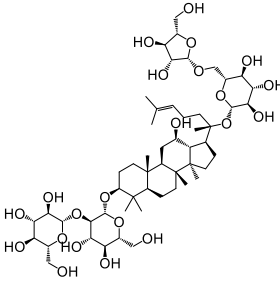   | 8.13  | 0.04 | <i>P. ginseng</i> |
| M25 <sup>#</sup> | ginsenoside Rd  |    | 5.02  | 0.11 | <i>P. ginseng</i> |
| M26 <sup>#</sup> | ginsenoside Re  |   | 4.27  | 0.12 | <i>P. ginseng</i> |
| M27 <sup>#</sup> | ginsenoside Rf  |  | 17.74 | 0.24 | <i>P. ginseng</i> |
| M28 <sup>#</sup> | ginsenoside Rg1 |  | 11.21 | 0.23 | <i>P. ginseng</i> |

---

---

|                  |                 |                                                                                     |       |      |                   |
|------------------|-----------------|-------------------------------------------------------------------------------------|-------|------|-------------------|
| M29 <sup>#</sup> | ginsenoside Rg2 | 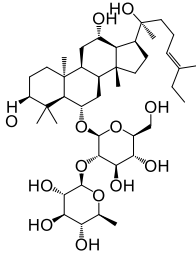   | 10.09 | 0.26 | <i>P. ginseng</i> |
| M30 <sup>#</sup> | ginsenoside Rg3 |    | 12.43 | 0.22 | <i>P. ginseng</i> |
| M31 <sup>#</sup> | ginsenoside Rg4 |   | 11.34 | 0.21 | <i>P. ginseng</i> |
| M32 <sup>#</sup> | ginsenoside Rg5 |  | 6.15  | 0.23 | <i>P. ginseng</i> |
| M33 <sup>#</sup> | ginsenoside Rg6 |  | 7.03  | 0.19 | <i>P. ginseng</i> |

---

|                  |                  |                                                                                     |       |      |                   |
|------------------|------------------|-------------------------------------------------------------------------------------|-------|------|-------------------|
| M34              | ginsenoside Rg7  | 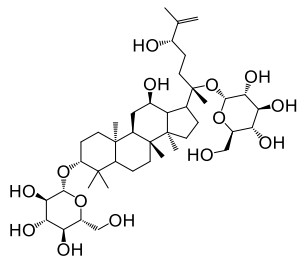   | 34    | 0.24 | <i>P. ginseng</i> |
| M35              | methyl linoleate |    | 41.93 | 0.17 | <i>P. ginseng</i> |
| M36 <sup>#</sup> | ginsenoside Rh1  |    | 3.86  | 0.57 | <i>P. ginseng</i> |
| M37 <sup>#</sup> | ginsenoside Rh2  |   | 6.54  | 0.56 | <i>P. ginseng</i> |
| M38 <sup>#</sup> | ginsenoside Rh3  |  | 6.18  | 0.53 | <i>P. ginseng</i> |
| M39 <sup>#</sup> | ginsenoside Rh4  |  | 3.25  | 0.60 | <i>P. ginseng</i> |
| M40 <sup>#</sup> | ginsenoside Rh5  |  | 3.23  | 0.57 | <i>P. ginseng</i> |



|                  |                 |                                                                                     |       |      |                   |
|------------------|-----------------|-------------------------------------------------------------------------------------|-------|------|-------------------|
| M41 <sup>#</sup> | ginsenoside Rh6 | 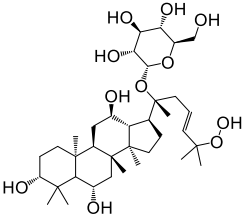   | 6.46  | 0.55 | <i>P. ginseng</i> |
| M42 <sup>#</sup> | ginsenoside Rh7 |    | 7.72  | 0.6  | <i>P. ginseng</i> |
| M43 <sup>#</sup> | ginsenoside Rh9 |    | 7.13  | 0.37 | <i>P. ginseng</i> |
| M44 <sup>#</sup> | trifolin        |   | 3.10  | 0.74 | <i>P. ginseng</i> |
| M45 <sup>#</sup> | alexandrin      |  | 20.46 | 0.65 | <i>P. ginseng</i> |
| M46 <sup>#</sup> | ginsenoside Ro  |  | 1.98  | 0.05 | <i>P. ginseng</i> |
| M47 <sup>#</sup> | deoxygomisin A  |  | 20.16 | 0.75 | <i>P. ginseng</i> |

|                  |                       |                                                                                     |       |      |                   |
|------------------|-----------------------|-------------------------------------------------------------------------------------|-------|------|-------------------|
| M48              | girininbin            | 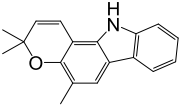   | 61.22 | 0.31 | <i>P. ginseng</i> |
| M49              | gomisin B             |    | 31.99 | 0.83 | <i>P. ginseng</i> |
| M50              | inermin               |    | 65.83 | 0.54 | <i>P. ginseng</i> |
| M51              | kaempferol            |    | 41.88 | 0.24 | <i>P. ginseng</i> |
| M52              | malkangunin           |    | 57.71 | 0.63 | <i>P. ginseng</i> |
| M53 <sup>#</sup> | malonylginsenoside Rd |   | 8.84  | 0.07 | <i>P. ginseng</i> |
| M54 <sup>#</sup> | notoginsenoside R2    |  | 17.74 | 0.28 | <i>P. ginseng</i> |
| M55              | panaxadiol            |  | 33.09 | 0.79 | <i>P. ginseng</i> |

|                  |                     |                                                                                     |       |      |                   |
|------------------|---------------------|-------------------------------------------------------------------------------------|-------|------|-------------------|
| M56 <sup>#</sup> | protopanaxadiol     | 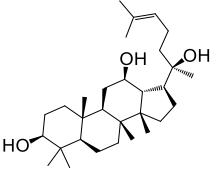   | 29.69 | 0.77 | <i>P. ginseng</i> |
| M57              | stigmasterol        |    | 43.83 | 0.76 | <i>P. ginseng</i> |
| M58              | suchilactone        |    | 57.52 | 0.56 | <i>P. ginseng</i> |
| M59 <sup>#</sup> | $\beta$ -elemene    |    | 25.63 | 0.06 | <i>P. ginseng</i> |
| M60              | $\beta$ -sitosterol |   | 36.91 | 0.75 | <i>P. ginseng</i> |
| M61 <sup>#</sup> | elemicin            |  | 21.94 | 0.06 | <i>P. ginseng</i> |
| M62 <sup>#</sup> | nepetin             |  | 26.75 | 0.31 | <i>P. ginseng</i> |
| M63 <sup>#</sup> | panaxatriol         |  | 15.42 | 0.79 | <i>P. ginseng</i> |

|                  |                              |                                                                                     |       |      |                   |
|------------------|------------------------------|-------------------------------------------------------------------------------------|-------|------|-------------------|
| M64 <sup>#</sup> | campesteryl ferulate         | 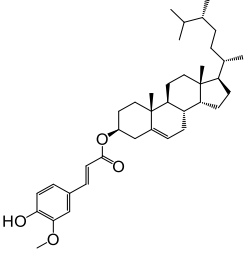   | 22.10 | 0.59 | <i>P. ginseng</i> |
| M65 <sup>#</sup> | paeonol                      |    | 28.79 | 0.04 | <i>P. ginseng</i> |
| M66 <sup>#</sup> | $\alpha$ -guttiferin         |    | 4.43  | 0.65 | <i>P. ginseng</i> |
| M67 <sup>#</sup> | trifolirhizin                |    | 7.62  | 0.79 | <i>P. ginseng</i> |
| M68 <sup>#</sup> | kaempferol-3-arabofuranoside |   | 2.73  | 0.65 | <i>P. ginseng</i> |
| M69              | apohyoscine                  |  | 46.47 | 0.25 | <i>P. ginseng</i> |
| M70 <sup>#</sup> | guaiene                      |  | 28.21 | 0.07 | <i>P. ginseng</i> |
| M71 <sup>#</sup> | $\gamma$ -selinene           |  | 18.02 | 0.08 | <i>P. ginseng</i> |
| M72 <sup>#</sup> | dibutyl phthalate            |  | 64.54 | 0.13 | <i>P. ginseng</i> |

---

M73<sup>#</sup>

riboflavine

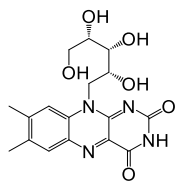

18.18 0.5 *P. ginseng*

---

OB, oral bioavailability; DL, druglikeness; *A. macrocephala* (*Atractylodis macrocephalae rhizoma*, Baizhu); *P. Ginseng* (*Ginseng radix et rhizoma*, Renshen).

<sup>#</sup>Compounds with OB < 30% and/or DL < 0.18, yet pharmaceutically validated.

**Supplementary Table S4** Target information of Shenzhu Capsule.

| No. | Target  | Gene name                                                        | Origin              |
|-----|---------|------------------------------------------------------------------|---------------------|
| T1  | ST3GAL1 | ST3 beta-galactoside alpha-2,3-sialyltransferase 1               | <i>Homo sapiens</i> |
| T2  | NOS1    | nitric oxide synthase 1                                          | <i>Homo sapiens</i> |
| T3  | FAS     | Fas cell surface death receptor                                  | <i>Homo sapiens</i> |
| T4  | NQO1    | NAD(P)H quinone dehydrogenase 1                                  | <i>Homo sapiens</i> |
| T5  | STAT1   | signal transducer and activator of transcription 1               | <i>Homo sapiens</i> |
| T6  | GLI1    | GLI family zinc finger 1                                         | <i>Homo sapiens</i> |
| T7  | PDGFB   | platelet derived growth factor subunit B                         | <i>Homo sapiens</i> |
| T8  | LAP3    | leucine aminopeptidase 3                                         | <i>Homo sapiens</i> |
| T9  | AHR     | aryl hydrocarbon receptor                                        | <i>Homo sapiens</i> |
| T10 | CYP27B1 | cytochrome P450 family 27 subfamily B member 1                   | <i>Homo sapiens</i> |
| T11 | TRPA1   | transient receptor potential cation channel subfamily A member 1 | <i>Homo sapiens</i> |
| T12 | ADRA1D  | adrenoceptor alpha 1D                                            | <i>Homo sapiens</i> |
| T13 | SNCA    | synuclein alpha                                                  | <i>Homo sapiens</i> |
| T14 | KL      | klotho                                                           | <i>Homo sapiens</i> |
| T15 | CYP17A1 | cytochrome P450 family 17 subfamily A member 1                   | <i>Homo sapiens</i> |
| T16 | PLA2G2A | phospholipase A2 group IIA                                       | <i>Homo sapiens</i> |
| T17 | APOE    | apolipoprotein E                                                 | <i>Homo sapiens</i> |
| T18 | CYP3A4  | cytochrome P450 family 3 subfamily A member 4                    | <i>Homo sapiens</i> |
| T19 | ODC1    | ornithine decarboxylase 1                                        | <i>Homo sapiens</i> |
| T20 | BAX     | BCL2 associated X, apoptosis regulator                           | <i>Homo sapiens</i> |
| T21 | MC4R    | melanocortin 4 receptor                                          | <i>Homo sapiens</i> |
| T22 | ACADS   | acyl-CoA dehydrogenase, C-2 to C-3 short chain                   | <i>Homo sapiens</i> |
| T23 | PPARD   | peroxisome proliferator activated receptor delta                 | <i>Homo sapiens</i> |
| T24 | CYP2E1  | cytochrome P450 family 2 subfamily E member 1                    | <i>Homo sapiens</i> |
| T25 | RXRA    | retinoid X receptor alpha                                        | <i>Homo sapiens</i> |
| T26 | LEP     | leptin                                                           | <i>Homo sapiens</i> |
| T27 | DNMT1   | DNA methyltransferase 1                                          | <i>Homo sapiens</i> |
| T28 | SELP    | selectin P                                                       | <i>Homo sapiens</i> |

|     |          |                                                                            |                     |
|-----|----------|----------------------------------------------------------------------------|---------------------|
| T29 | LGALS9   | galectin 9                                                                 | <i>Homo sapiens</i> |
| T30 | MPO      | myeloperoxidase                                                            | <i>Homo sapiens</i> |
| T31 | CCNB1    | cyclin B1                                                                  | <i>Homo sapiens</i> |
| T32 | SNAI2    | snail family transcriptional repressor 2                                   | <i>Homo sapiens</i> |
| T33 | PTEN     | phosphatase and tensin homolog                                             | <i>Homo sapiens</i> |
| T34 | PPARA    | peroxisome proliferator activated receptor alpha                           | <i>Homo sapiens</i> |
| T35 | GAS6     | growth arrest specific 6                                                   | <i>Homo sapiens</i> |
| T36 | CREB1    | cAMP responsive element binding protein 1                                  | <i>Homo sapiens</i> |
| T37 | FADD     | Fas associated via death domain                                            | <i>Homo sapiens</i> |
| T38 | AIFM1    | apoptosis inducing factor, mitochondria associated 1                       | <i>Homo sapiens</i> |
| T39 | ACOX1    | acyl-CoA oxidase 1                                                         | <i>Homo sapiens</i> |
| T40 | PTGS2    | prostaglandin-endoperoxide synthase 2                                      | <i>Homo sapiens</i> |
| T41 | FGF2     | fibroblast growth factor 2                                                 | <i>Homo sapiens</i> |
| T42 | IKBKB    | inhibitor of kappa light polypeptide gene enhancer in B-cells, kinase beta | <i>Homo sapiens</i> |
| T43 | NR3C1    | nuclear receptor subfamily 3 group C member 1                              | <i>Homo sapiens</i> |
| T44 | SELE     | selectin E                                                                 | <i>Homo sapiens</i> |
| T45 | INS      | insulin                                                                    | <i>Homo sapiens</i> |
| T46 | HSP90AB1 | heat shock protein 90 alpha family class B member 1                        | <i>Homo sapiens</i> |
| T47 | SPARC    | secreted protein acidic and cysteine rich                                  | <i>Homo sapiens</i> |
| T48 | CYP1A2   | cytochrome P450 family 1 subfamily A member 2                              | <i>Homo sapiens</i> |
| T49 | ANXA1    | annexin A1                                                                 | <i>Homo sapiens</i> |
| T50 | EDNRB    | endothelin receptor type B                                                 | <i>Homo sapiens</i> |
| T51 | SERPINE1 | serpin family E member 1                                                   | <i>Homo sapiens</i> |
| T52 | FAAH     | fatty acid amide hydrolase                                                 | <i>Homo sapiens</i> |
| T53 | DRD2     | dopamine receptor D2                                                       | <i>Homo sapiens</i> |
| T54 | CBR1     | carbonyl reductase 1                                                       | <i>Homo sapiens</i> |
| T55 | GSR      | glutathione-disulfide reductase                                            | <i>Homo sapiens</i> |
| T56 | CAT      | catalase                                                                   | <i>Homo sapiens</i> |
| T57 | ITGAL    | integrin subunit alpha L                                                   | <i>Homo sapiens</i> |
| T58 | MAPK14   | mitogen-activated protein kinase 14                                        | <i>Homo sapiens</i> |

|     |         |                                                                             |                     |
|-----|---------|-----------------------------------------------------------------------------|---------------------|
| T59 | TYMS    | thymidylate synthetase                                                      | <i>Homo sapiens</i> |
| T60 | CHRM5   | cholinergic receptor muscarinic 5                                           | <i>Homo sapiens</i> |
| T61 | TLR2    | toll like receptor 2                                                        | <i>Homo sapiens</i> |
| T62 | CALB1   | calbindin 1                                                                 | <i>Homo sapiens</i> |
| T63 | POR     | cytochrome p450 oxidoreductase                                              | <i>Homo sapiens</i> |
| T64 | TNFSF11 | tumor necrosis factor superfamily member 11                                 | <i>Homo sapiens</i> |
| T65 | HIF1A   | hypoxia inducible factor 1 alpha subunit                                    | <i>Homo sapiens</i> |
| T66 | INSR    | insulin receptor                                                            | <i>Homo sapiens</i> |
| T67 | ABCC4   | ATP binding cassette subfamily C member 4                                   | <i>Homo sapiens</i> |
| T68 | TNF     | tumor necrosis factor                                                       | <i>Homo sapiens</i> |
| T69 | ALDH1A1 | aldehyde dehydrogenase 1 family member A1                                   | <i>Homo sapiens</i> |
| T70 | RORA    | RAR related orphan receptor A                                               | <i>Homo sapiens</i> |
| T71 | IGF1    | insulin like growth factor 1                                                | <i>Homo sapiens</i> |
| T72 | NOX4    | NADPH oxidase 4                                                             | <i>Homo sapiens</i> |
| T73 | IKBKG   | inhibitor of kappa light polypeptide gene enhancer in B-cells, kinase gamma | <i>Homo sapiens</i> |
| T74 | AGT     | angiotensinogen                                                             | <i>Homo sapiens</i> |
| T75 | XBP1    | X-box binding protein 1                                                     | <i>Homo sapiens</i> |
| T76 | PPARG   | peroxisome proliferator activated receptor gamma                            | <i>Homo sapiens</i> |
| T77 | ANPEP   | alanyl aminopeptidase, membrane                                             | <i>Homo sapiens</i> |
| T78 | SELL    | selectin L                                                                  | <i>Homo sapiens</i> |
| T79 | TGFBR1  | transforming growth factor beta receptor 1                                  | <i>Homo sapiens</i> |
| T80 | CA2     | carbonic anhydrase 2                                                        | <i>Homo sapiens</i> |
| T81 | GPBAR1  | G protein-coupled bile acid receptor 1                                      | <i>Homo sapiens</i> |
| T82 | HRAS    | HRas proto-oncogene, GTPase                                                 | <i>Homo sapiens</i> |
| T83 | IL13    | interleukin 13                                                              | <i>Homo sapiens</i> |
| T84 | TUBB3   | tubulin beta 3 class III                                                    | <i>Homo sapiens</i> |
| T85 | PTPN2   | protein tyrosine phosphatase, non-receptor type 2                           | <i>Homo sapiens</i> |
| T86 | NAMPT   | nicotinamide phosphoribosyltransferase                                      | <i>Homo sapiens</i> |
| T87 | IFNG    | interferon gamma                                                            | <i>Homo sapiens</i> |
| T88 | IL2     | interleukin 2                                                               | <i>Homo sapiens</i> |



|      |         |                                                                        |                     |
|------|---------|------------------------------------------------------------------------|---------------------|
| T89  | NR1H4   | nuclear receptor subfamily 1 group H member 4                          | <i>Homo sapiens</i> |
| T90  | TOP1    | topoisomerase                                                          | <i>Homo sapiens</i> |
| T91  | IL6     | interleukin 6                                                          | <i>Homo sapiens</i> |
| T92  | PROC    | protein C, inactivator of coagulation factors Va and VIIIa             | <i>Homo sapiens</i> |
| T93  | VEGFA   | vascular endothelial growth factor A                                   | <i>Homo sapiens</i> |
| T94  | PDCD4   | programmed cell death 4 (neoplastic transformation inhibitor)          | <i>Homo sapiens</i> |
| T95  | ACE     | angiotensin I converting enzyme                                        | <i>Homo sapiens</i> |
| T96  | MAP2K1  | mitogen-activated protein kinase kinase 1                              | <i>Homo sapiens</i> |
| T97  | CRP     | C-reactive protein                                                     | <i>Homo sapiens</i> |
| T98  | ALOX5   | arachidonate 5-lipoxygenase                                            | <i>Homo sapiens</i> |
| T99  | HPGD    | hydroxyprostaglandin dehydrogenase 15-                                 | <i>Homo sapiens</i> |
| T100 | SLCO1B1 | solute carrier organic anion transporter family member 1B1             | <i>Homo sapiens</i> |
| T101 | FBP1    | fructose-bisphosphatase 1                                              | <i>Homo sapiens</i> |
| T102 | GSTP1   | glutathione S-transferase pi 1                                         | <i>Homo sapiens</i> |
| T103 | PTGS1   | prostaglandin-endoperoxide synthase 1                                  | <i>Homo sapiens</i> |
| T104 | PRTN3   | proteinase 3                                                           | <i>Homo sapiens</i> |
| T105 | F2      | coagulation factor II, thrombin                                        | <i>Homo sapiens</i> |
| T106 | ALPI    | alkaline phosphatase, intestinal                                       | <i>Homo sapiens</i> |
| T107 | CDK5    | cyclin dependent kinase 5                                              | <i>Homo sapiens</i> |
| T108 | CXCL8   | C-X-C motif chemokine ligand 8                                         | <i>Homo sapiens</i> |
| T109 | CACNA1C | calcium voltage-gated channel subunit alpha1 C                         | <i>Homo sapiens</i> |
| T110 | SREBF2  | sterol regulatory element binding transcription factor 2               | <i>Homo sapiens</i> |
| T111 | TLR4    | toll like receptor 4                                                   | <i>Homo sapiens</i> |
| T112 | BGLAP   | bone gamma-carboxyglutamate protein                                    | <i>Homo sapiens</i> |
| T113 | PIK3CG  | phosphatidylinositol-4,5-bisphosphate 3-kinase catalytic subunit gamma | <i>Homo sapiens</i> |
| T114 | S100A9  | S100 calcium binding protein A9                                        | <i>Homo sapiens</i> |
| T115 | TOP2A   | topoisomerase (DNA) II alpha                                           | <i>Homo sapiens</i> |

|      |          |                                                           |                     |
|------|----------|-----------------------------------------------------------|---------------------|
| T116 | IGF1R    | insulin like growth factor 1 receptor                     | <i>Homo sapiens</i> |
| T117 | XDH      | xanthine dehydrogenase                                    | <i>Homo sapiens</i> |
| T118 | PRMT1    | protein arginine methyltransferase 1                      | <i>Homo sapiens</i> |
| T119 | HSP90AA1 | heat shock protein 90 alpha family class A member 1       | <i>Homo sapiens</i> |
| T120 | HMGCR    | 3-hydroxy-3-methylglutaryl-CoA reductase                  | <i>Homo sapiens</i> |
| T121 | TERT     | telomerase reverse transcriptase                          | <i>Homo sapiens</i> |
| T122 | CASP3    | caspase 3                                                 | <i>Homo sapiens</i> |
| T123 | COL1A1   | collagen type I alpha 1 chain                             | <i>Homo sapiens</i> |
| T124 | NFE2L2   | nuclear factor, erythroid 2 like 2                        | <i>Homo sapiens</i> |
| T125 | SRC      | SRC proto-oncogene, non-receptor tyrosine kinase          | <i>Homo sapiens</i> |
| T126 | PLAU     | plasminogen activator, urokinase                          | <i>Homo sapiens</i> |
| T127 | NR0B1    | nuclear receptor subfamily 0 group B member 1             | <i>Homo sapiens</i> |
| T128 | EDN1     | endothelin 1                                              | <i>Homo sapiens</i> |
| T129 | ASNS     | asparagine synthetase (glutamine-hydrolyzing)             | <i>Homo sapiens</i> |
| T130 | NR1H3    | nuclear receptor subfamily 1 group H member 3             | <i>Homo sapiens</i> |
| T131 | NPPA     | natriuretic peptide A                                     | <i>Homo sapiens</i> |
| T132 | Nos2     | nitric oxide synthase 2                                   | <i>Homo sapiens</i> |
| T133 | PRKAB1   | protein kinase AMP-activated non-catalytic subunit beta 1 | <i>Homo sapiens</i> |
| T134 | VDR      | vitamin D (1,25- dihydroxyvitamin D3) receptor            | <i>Homo sapiens</i> |
| T135 | ABCC1    | ATP binding cassette subfamily C member 1                 | <i>Homo sapiens</i> |
| T136 | MMP3     | matrix metalloproteinase 3                                | <i>Homo sapiens</i> |
| T137 | JUN      | Jun proto-oncogene, AP-1 transcription factor subunit     | <i>Homo sapiens</i> |
| T138 | IL1B     | interleukin 1 beta                                        | <i>Homo sapiens</i> |
| T139 | LCT      | lactase                                                   | <i>Homo sapiens</i> |
| T140 | PADI4    | peptidyl arginine deiminase 4                             | <i>Homo sapiens</i> |
| T141 | TPMT     | thiopurine S-methyltransferase                            | <i>Homo sapiens</i> |
| T142 | ADRB2    | adrenoceptor beta 2                                       | <i>Homo sapiens</i> |
| T143 | MMP1     | matrix metalloproteinase 1                                | <i>Homo sapiens</i> |
| T144 | SLC25A20 | solute carrier family 25 member 20                        | <i>Homo sapiens</i> |
| T145 | BCL2     | BCL2, apoptosis regulator                                 | <i>Homo sapiens</i> |

|      |          |                                                                        |                     |
|------|----------|------------------------------------------------------------------------|---------------------|
| T146 | CYP19A1  | cytochrome P450 family 19 subfamily A member 1                         | <i>Homo sapiens</i> |
| T147 | NOS3     | nitric oxide synthase 3                                                | <i>Homo sapiens</i> |
| T148 | MMP9     | matrix metalloproteinase 9                                             | <i>Homo sapiens</i> |
| T149 | CDKN1A   | cyclin dependent kinase inhibitor 1A                                   | <i>Homo sapiens</i> |
| T150 | AREG     | amphiregulin                                                           | <i>Homo sapiens</i> |
| T151 | RBP1     | retinol binding protein 1                                              | <i>Homo sapiens</i> |
| T152 | KDR      | kinase insert domain receptor                                          | <i>Homo sapiens</i> |
| T153 | ABCG1    | ATP binding cassette subfamily G member 1                              | <i>Homo sapiens</i> |
| T154 | CNR1     | cannabinoid receptor 1                                                 | <i>Homo sapiens</i> |
| T155 | F3       | coagulation factor III, tissue factor                                  | <i>Homo sapiens</i> |
| T156 | SLC10A1  | solute carrier family 10 member 1                                      | <i>Homo sapiens</i> |
| T157 | ATP4A    | ATPase H <sup>+</sup> /K <sup>+</sup> transporting alpha subunit       | <i>Homo sapiens</i> |
| T158 | AGRN     | agrin                                                                  | <i>Homo sapiens</i> |
| T159 | RELA     | RELA proto-oncogene, NF-kB subunit                                     | <i>Homo sapiens</i> |
| T160 | APP      | amyloid beta precursor protein                                         | <i>Homo sapiens</i> |
| T161 | ESR2     | estrogen receptor 2                                                    | <i>Homo sapiens</i> |
| T162 | MAPK9    | mitogen-activated protein kinase 9                                     | <i>Homo sapiens</i> |
| T163 | MAPK1    | mitogen-activated protein kinase 1                                     | <i>Homo sapiens</i> |
| T164 | TGFB1    | transforming growth factor beta 1                                      | <i>Homo sapiens</i> |
| T165 | ITGAV    | integrin subunit alpha V                                               | <i>Homo sapiens</i> |
| T166 | ABCB11   | ATP binding cassette subfamily B member 11                             | <i>Homo sapiens</i> |
| T167 | TRPV1    | transient receptor potential cation channel subfamily V member 1       | <i>Homo sapiens</i> |
| T168 | CDK2     | cyclin dependent kinase 2                                              | <i>Homo sapiens</i> |
| T169 | TNFRSF1A | TNF receptor superfamily member 1A                                     | <i>Homo sapiens</i> |
| T170 | AHSA1    | activator of Hsp90 ATPase activity 1                                   | <i>Homo sapiens</i> |
| T171 | PIK3CA   | phosphatidylinositol-4,5-bisphosphate 3-kinase catalytic subunit alpha | <i>Homo sapiens</i> |
| T172 | JAK3     | Janus kinase 3                                                         | <i>Homo sapiens</i> |
| T173 | ACHE     | acetylcholinesterase (Cartwright blood group)                          | <i>Homo sapiens</i> |
| T174 | NFKB1    | nuclear factor kappa B subunit 1                                       | <i>Homo sapiens</i> |

|      |         |                                                                |                     |
|------|---------|----------------------------------------------------------------|---------------------|
| T175 | PTGIS   | prostaglandin I2 synthase                                      | <i>Homo sapiens</i> |
| T176 | ABCG2   | ATP binding cassette subfamily G member 2 (Junior blood group) | <i>Homo sapiens</i> |
| T177 | ABCA1   | ATP binding cassette subfamily A member 1                      | <i>Homo sapiens</i> |
| T178 | TXNRD1  | thioredoxin reductase 1                                        | <i>Homo sapiens</i> |
| T179 | SLC19A1 | solute carrier family 19 member 1                              | <i>Homo sapiens</i> |
| T180 | RB1     | RB transcriptional corepressor 1                               | <i>Homo sapiens</i> |
| T181 | CDK6    | cyclin dependent kinase 6                                      | <i>Homo sapiens</i> |
| T182 | MAPK8   | mitogen-activated protein kinase 8                             | <i>Homo sapiens</i> |
| T183 | S100A8  | S100 calcium binding protein A8                                | <i>Homo sapiens</i> |
| T184 | MAOA    | monoamine oxidase A                                            | <i>Homo sapiens</i> |
| T185 | MTNR1B  | melatonin receptor 1B                                          | <i>Homo sapiens</i> |
| T186 | LYZ     | lysozyme                                                       | <i>Homo sapiens</i> |
| T187 | AR      | androgen receptor                                              | <i>Homo sapiens</i> |
| T188 | G6PD    | glucose-6-phosphate dehydrogenase                              | <i>Homo sapiens</i> |
| T189 | SI      | sucrase-isomaltase                                             | <i>Homo sapiens</i> |
| T190 | ABCC2   | ATP binding cassette subfamily C member 2                      | <i>Homo sapiens</i> |
| T191 | ACAD8   | acyl-CoA dehydrogenase family member 8                         | <i>Homo sapiens</i> |
| T192 | AKT1    | AKT serine/threonine kinase 1                                  | <i>Homo sapiens</i> |
| T193 | VCAM1   | vascular cell adhesion molecule 1                              | <i>Homo sapiens</i> |
| T194 | ABCB1   | ATP binding cassette subfamily B member 1                      | <i>Homo sapiens</i> |
| T195 | MGMT    | O-6-methylguanine-DNA methyltransferase                        | <i>Homo sapiens</i> |
| T196 | DNAJB9  | DnaJ heat shock protein family (Hsp40) member B9               | <i>Homo sapiens</i> |
| T197 | ADA     | adenosine deaminase                                            | <i>Homo sapiens</i> |
| T198 | CYP1A1  | cytochrome P450 family 1 subfamily A member 1                  | <i>Homo sapiens</i> |
| T199 | ICAM1   | intercellular adhesion molecule 1                              | <i>Homo sapiens</i> |
| T200 | TP53    | tumor protein p53                                              | <i>Homo sapiens</i> |
| T201 | PROS1   | protein S                                                      | <i>Homo sapiens</i> |
| T202 | CYP1B1  | cytochrome P450 family 1 subfamily B member 1                  | <i>Homo sapiens</i> |
| T203 | TTR     | transthyretin                                                  | <i>Homo sapiens</i> |
| T204 | ADIPOQ  | adiponectin, C1Q and collagen domain containing                | <i>Homo sapiens</i> |

|      |        |                                              |                     |
|------|--------|----------------------------------------------|---------------------|
| T205 | PRKCA  | protein kinase C alpha                       | <i>Homo sapiens</i> |
| T206 | GSK3B  | glycogen synthase kinase 3 beta              | <i>Homo sapiens</i> |
| T207 | RNASE1 | ribonuclease A family member 1, pancreatic   | <i>Homo sapiens</i> |
| T208 | HMOX1  | heme oxygenase 1                             | <i>Homo sapiens</i> |
| T209 | CHUK   | conserved helix-loop-helix ubiquitous kinase | <i>Homo sapiens</i> |
| T210 | CNR2   | cannabinoid receptor 2                       | Homo sapiens        |

---

**Supplementary Table S5** Target information of synthetic drugs used for treatment of ulcerative colitis (UC).

| No. | Target  | Gene name                                                                  | Origin              |
|-----|---------|----------------------------------------------------------------------------|---------------------|
| T1  | IKBKB   | inhibitor of kappa light polypeptide gene enhancer in B-cells, kinase beta | <i>Homo sapiens</i> |
| T2  | MMP12   | matrix metalloproteinase 12                                                | <i>Homo sapiens</i> |
| T3  | ATP4A   | ATPase H <sup>+</sup> /K <sup>+</sup> transporting alpha subunit           | <i>Homo sapiens</i> |
| T4  | IL1A    | interleukin 1 alpha                                                        | <i>Homo sapiens</i> |
| T5  | MC3R    | melanocortin 3 receptor                                                    | <i>Homo sapiens</i> |
| T6  | S100P   | S100 calcium binding protein P                                             | <i>Homo sapiens</i> |
| T7  | MPO     | myeloperoxidase                                                            | <i>Homo sapiens</i> |
| T8  | MC4R    | melanocortin 4 receptor                                                    | <i>Homo sapiens</i> |
| T9  | IL13RA2 | interleukin 13 receptor subunit alpha 2                                    | <i>Homo sapiens</i> |
| T10 | SKIV2L2 | Ski2 like RNA helicase 2                                                   | <i>Homo sapiens</i> |
| T11 | ALOX5   | arachidonate 5-lipoxygenase                                                | <i>Homo sapiens</i> |
| T12 | CCKBR   | cholecystokinin B receptor                                                 | <i>Homo sapiens</i> |
| T13 | PTGS2   | prostaglandin-endoperoxide synthase 2                                      | <i>Homo sapiens</i> |
| T14 | MADCAM1 | mucosal vascular addressin cell adhesion molecule 1                        | <i>Homo sapiens</i> |
| T15 | PLCG2   | phospholipase C gamma 2                                                    | <i>Homo sapiens</i> |
| T16 | HTR3A   | 5-hydroxytryptamine receptor 3A                                            | <i>Homo sapiens</i> |
| T17 | ATP4B   | ATPase H <sup>+</sup> /K <sup>+</sup> transporting beta subunit            | <i>Homo sapiens</i> |
| T18 | PTGS1   | prostaglandin-endoperoxide synthase 1                                      | <i>Homo sapiens</i> |
| T19 | PTGER4  | prostaglandin E receptor 4                                                 | <i>Homo sapiens</i> |
| T20 | CHRM5   | cholinergic receptor muscarinic 5                                          | <i>Homo sapiens</i> |
| T21 | IFNG    | interferon gamma                                                           | <i>Homo sapiens</i> |
| T22 | CIITA   | class II major histocompatibility complex transactivator                   | <i>Homo sapiens</i> |
| T23 | RFX5    | regulatory factor X5                                                       | <i>Homo sapiens</i> |
| T24 | IL13    | interleukin 13                                                             | <i>Homo sapiens</i> |
| T25 | MIF     | macrophage migration inhibitory factor (glycosylation-inhibiting factor)   | <i>Homo sapiens</i> |

|     |         |                                                              |                     |
|-----|---------|--------------------------------------------------------------|---------------------|
| T26 | RFXAP   | regulatory factor X associated protein                       | <i>Homo sapiens</i> |
| T27 | NR3C1   | nuclear receptor subfamily 3 group C member 1                | <i>Homo sapiens</i> |
| T28 | HPS1    | HPS1, biogenesis of lysosomal organelles complex 3 subunit 1 | <i>Homo sapiens</i> |
| T29 | ITGA4   | integrin subunit alpha 4                                     | <i>Homo sapiens</i> |
| T30 | TNF     | tumor necrosis factor                                        | <i>Homo sapiens</i> |
| T31 | IL6     | interleukin 6                                                | <i>Homo sapiens</i> |
| T32 | IL1B    | interleukin 1 beta                                           | <i>Homo sapiens</i> |
| T33 | SLC7A11 | solute carrier family 7 member 11                            | <i>Homo sapiens</i> |
| T34 | PPARG   | peroxisome proliferator activated receptor gamma             | <i>Homo sapiens</i> |
| T35 | HRH2    | histamine receptor H2                                        | <i>Homo sapiens</i> |
| T36 | ITGB7   | integrin subunit beta 7                                      | <i>Homo sapiens</i> |
| T37 | LRBA    | LPS responsive beige-like anchor protein                     | <i>Homo sapiens</i> |
| T38 | NFKB2   | nuclear factor kappa B subunit 2                             | <i>Homo sapiens</i> |
| T39 | ACAT1   | acetyl-CoA acetyltransferase 1                               | <i>Homo sapiens</i> |
| T40 | MTOR    | mechanistic target of rapamycin                              | <i>Homo sapiens</i> |
| T41 | RPS6KB1 | ribosomal protein S6 kinase B1                               | <i>Homo sapiens</i> |
| T42 | ICAM1   | intercellular adhesion molecule 1                            | <i>Homo sapiens</i> |
| T43 | KCNMA1  | potassium calcium-activated channel subfamily M alpha 1      | <i>Homo sapiens</i> |
| T44 | MMP9    | matrix metalloproteinase 9                                   | <i>Homo sapiens</i> |
| T45 | CHUK    | conserved helix-loop-helix ubiquitous kinase                 | <i>Homo sapiens</i> |
| T46 | RFXANK  | regulatory factor X associated ankyrin containing protein    | <i>Homo sapiens</i> |
| T47 | NOD2    | nucleotide binding oligomerization domain containing 2       | <i>Homo sapiens</i> |
| T48 | TPMT    | thiopurine S-methyltransferase                               | <i>Homo sapiens</i> |
| T49 | NCF4    | neutrophil cytosolic factor 4                                | <i>Homo sapiens</i> |
| T50 | FDPS    | farnesyl diphosphate synthase                                | <i>Homo sapiens</i> |
| T51 | NPR2    | natriuretic peptide receptor 2                               | <i>Homo sapiens</i> |
| T52 | CXCL10  | C-X-C motif chemokine ligand 10                              | <i>Homo sapiens</i> |

|     |          |                          |                     |
|-----|----------|--------------------------|---------------------|
| T53 | GUCY2C   | guanylate cyclase 2C     | <i>Homo sapiens</i> |
| T54 | SERPINC1 | serpin family C member 1 | <i>Homo sapiens</i> |

---



**Supplementary Table S6** Non-disease associated pathways for Shenzhu Capsule.

| Term                                 | Count | P-Value  | Genes                                                                                                                                                                                                                                                             |
|--------------------------------------|-------|----------|-------------------------------------------------------------------------------------------------------------------------------------------------------------------------------------------------------------------------------------------------------------------|
| TNF signaling pathway                | 29    | 4.64E-21 | TNF, PTGS2, MMP9, EDN1, NFKB1, MMP3, VCAM1, AKT1, TNFRSF1A, CASP3, PIK3CA, IL1B, FAS, CHUK, PIK3CG, ICAM1, IL6, MAP2K1, RELA, CREB1, FADD, MAPK1, JUN, MAPK14, IKBKG, MAPK9, MAPK8, IKBKB, SELE                                                                   |
| HIF-1 signaling pathway              | 24    | 3.27E-16 | PRKCA, PIK3CG, IL6, MAP2K1, RELA, EDN1, IGF1, NFKB1, TLR4, AKT1, IGF1R, MAPK1, CDKN1A, HIF1A, INS, BCL2, IFNG, SERPINE1, VEGFA, PIK3CA, NOS3, NOS2, INSR, NPPA                                                                                                    |
| PI3K-Akt signaling pathway           | 39    | 1.97E-14 | HSP90AB1, HRAS, PDGFB, TLR2, NFKB1, TLR4, PTEN, AKT1, IGF1R, INS, BCL2, ITGAV, PIK3CA, NOS3, INSR, FGF2, CHUK, PRKCA, PIK3CG, IL6, HSP90AA1, MAP2K1, CREB1, RELA, RXRA, TP53, IGF1, CDK6, CDK2, KDR, MAPK1, CDKN1A, GSK3B, VEGFA, IKBKG, COL1A1, JAK3, IKBKB, IL2 |
| FoxO signaling pathway               | 25    | 5.16E-14 | PIK3CG, IL6, HRAS, MAP2K1, TGFBR1, PRKAB1, IGF1, PTEN, TGFB1, CDK2, AKT1, CCNB1, IGF1R, MAPK1, PRMT1, CDKN1A, INS, MAPK14, MAPK9, PIK3CA, MAPK8, CAT, IKBKB, INSR, CHUK                                                                                           |
| Toll-like receptor signaling pathway | 22    | 2.74E-13 | PIK3CG, IL6, TNF, MAP2K1, RELA, TLR2, CXCL8, NFKB1, TLR4, FADD, STAT1, AKT1, MAPK1, JUN, MAPK14, IKBKG, MAPK9, IL1B, PIK3CA, MAPK8, IKBKB, CHUK                                                                                                                   |
| Osteoclast differentiation           | 24    | 2.81E-13 | PIK3CG, TNF, MAP2K1, CREB1, TGFBR1, RELA, PPARG, NFKB1, STAT1, TGFB1, AKT1, TNFRSF1A, MAPK1, TNFSF11, JUN, MAPK14, IKBKG, IFNG, MAPK9, IL1B, PIK3CA, MAPK8, IKBKB, CHUK                                                                                           |

|                                     |    |          |                                                                                                                                                                          |
|-------------------------------------|----|----------|--------------------------------------------------------------------------------------------------------------------------------------------------------------------------|
| Prolactin signaling pathway         | 18 | 2.19E-12 | PIK3CG, HRAS, MAP2K1, RELA, NFKB1, ESR2, STAT1, SRC, AKT1, MAPK1, CYP17A1, TNFSF11, INS, GSK3B, MAPK14, MAPK9, PIK3CA, MAPK8                                             |
| Apoptosis                           | 17 | 2.87E-12 | PIK3CG, TNF, AIFM1, RELA, TP53, NFKB1, FADD, AKT1, TNFRSF1A, CASP3, BAX, BCL2, IKBKG, PIK3CA, FAS, IKBKB, CHUK                                                           |
| NOD-like receptor signaling pathway | 15 | 8.56E-11 | HSP90AB1, IL6, TNF, HSP90AA1, RELA, CXCL8, NFKB1, MAPK1, MAPK14, IKBKG, IL1B, MAPK9, MAPK8, IKBKB, CHUK                                                                  |
| Sphingolipid signaling pathway      | 20 | 2.43E-10 | PRKCA, PIK3CG, HRAS, TNF, MAP2K1, RELA, TP53, NFKB1, PTEN, AKT1, TNFRSF1A, MAPK1, BCL2, BAX, MAPK14, MAPK9, PIK3CA, ABCC1, NOS3, MAPK8                                   |
| Adipocytokine signaling pathway     | 15 | 2.68E-09 | PPARA, TNF, RXRA, RELA, PRKAB1, NFKB1, ADIPOQ, LEP, AKT1, TNFRSF1A, IKBKG, MAPK9, MAPK8, IKBKB, CHUK                                                                     |
| NF-κB signaling pathway             | 16 | 6.19E-09 | ICAM1, TNF, PTGS2, RELA, CXCL8, TLR4, NFKB1, VCAM1, TNFRSF1A, TNFSF11, BCL2, IKBKG, IL1B, IKBKB, CHUK, PLAU                                                              |
| T cell receptor signaling pathway   | 17 | 9.12E-09 | PIK3CG, HRAS, TNF, MAP2K1, RELA, NFKB1, AKT1, MAPK1, JUN, GSK3B, MAPK14, IFNG, IKBKG, PIK3CA, IKBKB, CHUK, IL2                                                           |
| VEGF signaling pathway              | 13 | 4.66E-08 | PRKCA, PIK3CG, AKT1, MAPK1, HRAS, MAP2K1, PTGS2, MAPK14, VEGFA, PIK3CA, NOS3, SRC, KDR                                                                                   |
| MAPK signaling pathway              | 25 | 4.88E-08 | PRKCA, HRAS, TNF, PDGFB, MAP2K1, TGFBR1, RELA, TP53, NFKB1, TGFB1, AKT1, TNFRSF1A, MAPK1, CASP3, JUN, MAPK14, IKBKG, MAPK9, IL1B, MAPK8, FAS, IKBKB, CACNA1C, FGF2, CHUK |
| Progesterone-mediated oocyte        | 15 | 5.07E-08 | HSP90AB1, PIK3CG, HSP90AA1, MAP2K1, IGF1, CDK2, AKT1, CCNB1,                                                                                                             |

|                                   |    |          |                                                                                                                                                           |
|-----------------------------------|----|----------|-----------------------------------------------------------------------------------------------------------------------------------------------------------|
| maturation                        |    |          | IGF1R, MAPK1, INS, MAPK14, MAPK9, PIK3CA, MAPK8                                                                                                           |
| Neurotrophin signaling pathway    | 17 | 8.50E-08 | PIK3CG, HRAS, MAP2K1, RELA, TP53, NFKB1, AKT1, MAPK1, JUN, BAX, MAPK14, GSK3B, BCL2, MAPK9, PIK3CA, MAPK8, IKBKB                                          |
| Ras signaling pathway             | 23 | 1.02E-07 | PRKCA, PIK3CG, HRAS, PDGFB, MAP2K1, RELA, IGF1, NFKB1, KDR, AKT1, IGF1R, MAPK1, INS, IKBKG, VEGFA, PLA2G2A, MAPK9, PIK3CA, MAPK8, IKBKB, FGF2, INSR, CHUK |
| B cell receptor signaling pathway | 13 | 1.96E-07 | PIK3CG, AKT1, MAPK1, HRAS, MAP2K1, RELA, JUN, GSK3B, IKBKG, PIK3CA, NFKB1, IKBKB, CHUK                                                                    |
| ErbB signaling pathway            | 14 | 3.80E-07 | PRKCA, PIK3CG, HRAS, MAP2K1, SRC, AKT1, MAPK1, CDKN1A, JUN, GSK3B, PIK3CA, MAPK9, MAPK8, AREG                                                             |
| Focal adhesion                    | 21 | 4.23E-07 | PRKCA, PIK3CG, HRAS, PDGFB, MAP2K1, IGF1, PTEN, SRC, KDR, AKT1, IGF1R, MAPK1, ITGAV, JUN, BCL2, GSK3B, VEGFA, MAPK9, PIK3CA, MAPK8, COL1A1                |
| Fc epsilon RI signaling pathway   | 12 | 1.37E-06 | PRKCA, PIK3CG, AKT1, MAPK1, HRAS, TNF, MAP2K1, MAPK14, PIK3CA, MAPK9, IL13, MAPK8                                                                         |
| Estrogen signaling pathway        | 14 | 1.74E-06 | HSP90AB1, PIK3CG, HRAS, HSP90AA1, MAP2K1, CREB1, MMP9, ESR2, SRC, AKT1, MAPK1, JUN, PIK3CA, NOS3                                                          |
| Rap1 signaling pathway            | 20 | 2.44E-06 | PRKCA, PIK3CG, ITGAL, HRAS, PDGFB, MAP2K1, DRD2, IGF1, SRC, KDR, AKT1, IGF1R, MAPK1, INS, CNR1, MAPK14, VEGFA, PIK3CA, FGF2, INSR                         |
| Thyroid hormone signaling pathway | 14 | 8.61E-06 | PRKCA, PIK3CG, HRAS, MAP2K1, RXRA, TP53, STAT1, SRC, AKT1, MAPK1, HIF1A, ITGAV, GSK3B, PIK3CA                                                             |

|                                                  |    |          |                                                                                                                             |
|--------------------------------------------------|----|----------|-----------------------------------------------------------------------------------------------------------------------------|
| p53 signaling pathway                            | 11 | 8.89E-06 | CCNB1, CDKN1A, CASP3, BAX, SERPINE1, TP53, IGF1, CDK6, FAS, PTEN, CDK2                                                      |
| Bile secretion                                   | 11 | 1.16E-05 | ABCB11, HMGCR, RXRA, SLCO1B1, ABCC4, ABCB1, ABCC2, CA2, NR1H4, ABCG2, SLC10A1                                               |
| RIG-I-like receptor signaling pathway            | 11 | 1.33E-05 | TNF, MAPK14, RELA, IKBKG, CXCL8, MAPK9, NFKB1, MAPK8, FADD, IKBKB, CHUK                                                     |
| cAMP signaling pathway                           | 18 | 1.72E-05 | PIK3CG, PPARA, ACOX1, MAP2K1, DRD2, CREB1, RELA, NFKB1, GLI1, AKT1, MAPK1, ADRB2, JUN, MAPK9, ABCC4, PIK3CA, MAPK8, CACNA1C |
| AMPK signaling pathway                           | 14 | 1.81E-05 | PIK3CG, HMGCR, CREB1, PPARG, FBP1, PRKAB1, IGF1, ADIPOQ, LEP, AKT1, IGF1R, INS, PIK3CA, INSR                                |
| mTOR signaling pathway                           | 10 | 1.83E-05 | PRKCA, PIK3CG, AKT1, MAPK1, TNF, INS, PIK3CA, IGF1, IKBKB, PTEN                                                             |
| Insulin signaling pathway                        | 14 | 6.73E-05 | PIK3CG, HRAS, MAP2K1, FBP1, PRKAB1, AKT1, MAPK1, INS, GSK3B, MAPK9, PIK3CA, MAPK8, IKBKB, INSR                              |
| Chemokine signaling pathway                      | 16 | 1.13E-04 | PIK3CG, HRAS, MAP2K1, RELA, CXCL8, NFKB1, STAT1, SRC, AKT1, MAPK1, GSK3B, IKBKG, PIK3CA, JAK3, IKBKB, CHUK                  |
| ABC transporters                                 | 8  | 1.36E-04 | ABCB11, ABCC4, ABCC1, ABCB1, ABCC2, ABCA1, ABCG1, ABCG2                                                                     |
| Cholinergic synapse                              | 12 | 1.57E-04 | PRKCA, PIK3CG, AKT1, MAPK1, ACHE, HRAS, CHRM5, MAP2K1, BCL2, CREB1, PIK3CA, CACNA1C                                         |
| Inflammatory mediator regulation of TRP channels | 11 | 2.47E-04 | PRKCA, PIK3CG, TRPV1, MAPK14, TRPA1, PIK3CA, MAPK9, IGF1, IL1B, MAPK8, SRC                                                  |
| Natural killer cell mediated                     | 12 | 3.62E-04 | PRKCA, PIK3CG, ICAM1, MAPK1, ITGAL, CASP3, HRAS, TNF, MAP2K1,                                                               |

|                                                          |    |          |                                                                                                       |
|----------------------------------------------------------|----|----------|-------------------------------------------------------------------------------------------------------|
| cytotoxicity                                             |    |          | IFNG, PIK3CA, FAS                                                                                     |
| Aldosterone-regulated sodium reabsorption                | 7  | 5.01E-04 | PRKCA, PIK3CG, MAPK1, INS, PIK3CA, IGF1, INSR                                                         |
| Regulation of lipolysis in adipocytes                    | 8  | 6.31E-04 | PIK3CG, AKT1, ADRB2, PTGS2, INS, PTGS1, PIK3CA, INSR                                                  |
| GnRH signaling pathway                                   | 10 | 6.36E-04 | PRKCA, MAPK1, HRAS, MAP2K1, MAPK14, JUN, MAPK9, MAPK8, CACNA1C, SRC                                   |
| Serotonergic synapse                                     | 11 | 6.75E-04 | PRKCA, MAPK1, APP, CASP3, HRAS, PTGS2, MAP2K1, MAOA, PTGS1, ALOX5, CACNA1C                            |
| Oxytocin signaling pathway                               | 13 | 9.40E-04 | PRKCA, PIK3CG, HRAS, PTGS2, MAP2K1, PRKAB1, SRC, MAPK1, CDKN1A, JUN, PIK3CA, NOS3, CACNA1C            |
| Cytokine-cytokine receptor interaction                   | 16 | 1.09E-03 | IL6, TNF, PDGFB, TGFBR1, CXCL8, IL13, TGFB1, KDR, LEP, TNFRSF1A, TNFSF11, IFNG, VEGFA, IL1B, FAS, IL2 |
| Signaling pathways regulating pluripotency of stem cells | 12 | 1.16E-03 | PIK3CG, AKT1, MAPK1, IGF1R, HRAS, MAP2K1, MAPK14, GSK3B, PIK3CA, IGF1, JAK3, FGF2                     |
| cGMP-PKG signaling pathway                               | 13 | 1.44E-03 | PIK3CG, AKT1, EDNRB, MAPK1, ADRB2, MAP2K1, INS, CREB1, PIK3CA, NOS3, CACNA1C, INSR, ADRA1D            |
| PPAR signaling pathway                                   | 8  | 1.85E-03 | PPARA, ACOX1, PPARD, RXRA, PPARG, ADIPOQ, MMP1, NR1H3                                                 |
| Steroid hormone biosynthesis                             | 7  | 4.10E-03 | CYP3A4, CYP17A1, CYP1B1, CYP1A1, CYP2E1, CYP1A2, CYP19A1                                              |
| Retrograde endocannabinoid signaling                     | 9  | 5.15E-03 | PRKCA, MAPK1, PTGS2, MAPK14, CNR1, FAAH, MAPK9, MAPK8, CACNA1C                                        |
| Adrenergic signaling in cardiomyocytes                   | 11 | 5.23E-03 | PRKCA, PIK3CG, AKT1, MAPK1, ADRB2, MAPK14, BCL2, CREB1, PIK3CA, CACNA1C, ADRA1D                       |

|                                  |    |           |                                                                                        |
|----------------------------------|----|-----------|----------------------------------------------------------------------------------------|
| Arachidonic acid metabolism      | 7  | 5.71E-03  | CBR1, PTGIS, PTGS2, PTGS1, PLA2G2A, ALOX5, CYP2E1                                      |
| Cytosolic DNA-sensing pathway    | 7  | 6.67E-03  | IL6, RELA, IKBKG, IL1B, NFKB1, IKBKB, CHUK                                             |
| Dopaminergic synapse             | 10 | 6.71E-03  | PRKCA, AKT1, DRD2, MAPK14, CREB1, GSK3B, MAOA, MAPK9,<br>MAPK8, CACNA1C                |
| Gap junction                     | 8  | 8.51E-03  | PRKCA, MAPK1, HRAS, PDGFB, MAP2K1, DRD2, SRC, TUBB3                                    |
| Arginine and proline metabolism  | 6  | 9.96E-03  | LAP3, ODC1, NOS1, MAOA, NOS3, NOS2                                                     |
| Regulation of actin cytoskeleton | 13 | 9.97 E-03 | PIK3CG, ITGAL, MAPK1, HRAS, CHRM5, MAP2K1, PDGFB, INS, ITGAV,<br>F2, PIK3CA, FGF2, SRC |

---

**Supplementary Table S7** Non-disease associated pathways of synthetic drugs used for treatment of ulcerative colitis (UC).

| Term                                         | Count | P-Value  | Genes                                                         |
|----------------------------------------------|-------|----------|---------------------------------------------------------------|
| Osteoclast differentiation                   | 10    | 1.78E-07 | TNF, NCF4, PLCG2, PPARG, IFNG, IL1B, NFKB2, IKBKB, IL1A, CHUK |
| TNF signaling pathway                        | 9     | 4.50E-07 | ICAM1, IL6, NOD2, TNF, MMP9, IL1B, IKBKB, CHUK, CXCL10        |
| NF- $\kappa$ B signaling pathway             | 7     | 2.38E-05 | ICAM1, TNF, PLCG2, IL1B, NFKB2, IKBKB, CHUK                   |
| NOD-like receptor signaling pathway          | 6     | 3.16E-05 | IL6, NOD2, TNF, IL1B, IKBKB, CHUK                             |
| Antigen processing and presentation          | 6     | 1.51E-04 | CIITA, TNF, RFX5, IFNG, RFXANK, RFXAP                         |
| Toll-like receptor signaling pathway         | 6     | 7.10E-04 | IL6, TNF, IL1B, IKBKB, CHUK, CXCL10                           |
| Cytosolic DNA-sensing pathway                | 5     | 8.86E-04 | IL6, IL1B, IKBKB, CHUK, CXCL10                                |
| Intestinal immune network for IgA production | 4     | 3.88E-03 | IL6, ITGB7, MADCAM1, ITGA4                                    |
| HIF-1 signaling pathway                      | 5     | 4.25E-03 | IL6, PLCG2, IFNG, RPS6KB1, MTOR                               |
| Cytokine-cytokine receptor interaction       | 7     | 4.36E-03 | IL6, TNF, IFNG, IL1B, IL13, IL1A, CXCL10                      |
| mTOR signaling pathway                       | 4     | 7.01E-03 | TNF, RPS6KB1, MTOR, IKBKB                                     |
| Leukocyte transendothelial migration         | 5     | 8.19E-03 | ICAM1, MMP9, NCF4, PLCG2, ITGA4                               |
